## Human $\alpha$ -Synuclein Inhibits Platelets Aggregation *in vitro* by Interfering with the $\alpha$ -Thrombin/Protease-Activated Receptor 1 Functional Axis

Giulia Pontarollo <sup>1,a,b</sup>, Laura Acquasaliente <sup>1,a</sup>, Claudia Maria Radu <sup>2,3</sup>, Daniele Peterle <sup>1,c</sup>, Ilaria Artusi <sup>1</sup>, Anna Pagotto <sup>1</sup>, Federico Uliana <sup>1,d</sup>, Paolo Simioni <sup>3</sup>, Alessandro Negro <sup>4,\*</sup>, and Vincenzo De Filippis <sup>1,5\*</sup>

From the <sup>1</sup> Department of Pharmaceutical and Pharmacological Sciences, University of Padua, Padua, Italy <sup>2</sup> Department of Women's & Children's Health, University of Padua, Padua, Italy <sup>3</sup> Department of Medicine, University of Padua, Padua, Italy; <sup>4</sup> Department of Biomedical Sciences, University of Padua, Padua, Italy, and <sup>5</sup> CRIBI, Biotechnology Center, of Padua, Padua, Italy

*Running title:*  $\alpha$ -Synuclein inhibits thrombin-induced platelet aggregation

### *Author information:*

<sup>a</sup> These authors equally contributed to this work

<sup>b</sup> Present address: Center for Thrombosis and Hemostasis (CTH) University Medical Center Mainz, Langenbeckstraße 1, 55131 Mainz, Germany

<sup>c</sup> Present address: Dept. of Chemistry and Chemical Biology, Northeastern University, 360 Huntington Ave. 02115, Boston, MA, USA

<sup>d</sup> Present address: Institute of Molecular Systems Biology, ETH Zurich, 8093 Zurich, Switzerland.

\* *Correspondence:* Vincenzo De Filippis, Department of Pharmaceutical and Pharmacological Sciences, University of Padua School of Medicine, via Marzolo, 5, Padua, 35131 Italy. Phone: (+39) 0498275698, e-mail: [vincenzo.defilippis@unipd.it](mailto:vincenzo.defilippis@unipd.it). Alessandro Negro, Dept. of Biomedical Sciences, University of Padua, viale G. Colombo 3, I-35100 Padova, Italy. Phone: (+39) 0498276166, e-mail: [alessandro.negro@unipd.it](mailto:alessandro.negro@unipd.it)

*Keywords:*  $\alpha$ -synuclein, thrombin, platelets, coagulation, Parkinson's disease.

**$\alpha$ -Synuclein ( $\alpha$ Syn) is a small (140 amino acids) disordered, acidic (pI: 4.7) protein, highly conserved in vertebrates and implicated in the pathogenesis of Parkinson's disease (PD), a neurodegenerative disease characterized by the deposition of  $\alpha$ Syn amyloid fibrils in dopaminergic neurons. Beyond the central nervous system, significant expression of  $\alpha$ Syn has also been measured in the blood (~1  $\mu$ M), where platelets are the main cellular hosts of  $\alpha$ Syn. Although the pathological implication of  $\alpha$ Syn in PD is widely accepted, the physiological role of blood  $\alpha$ Syn is still elusive. Starting from the notion that platelets are either the major cellular reservoir of  $\alpha$ Syn in the blood and, concomitantly, act as key players in hemostasis, being activated also by  $\alpha$ -thrombin ( $\alpha$ T) *via* cleavage of protease-activated receptors (PARs), we decided to investigate the possibility that  $\alpha$ Syn could modulate platelet activation by interfering with the  $\alpha$ T-PAR functional axis. Using multiple electrode aggregometry, i.e. a fast and specific platelet-function-testing method, as well as steady-state fluorescence spectroscopy, surface plasmon resonance, and fluorescence**

**microscopy, we show here that monomeric  $\alpha$ Syn functions as a negative regulator of  $\alpha$ T-mediated platelets activation.  $\alpha$ Syn acts either directly, *via* competitive inhibition of PAR1 activation by  $\alpha$ T and TRAP6 agonist, and indirectly, by scavenging  $\alpha$ T on the platelet plasma membrane. A simple electrostatic model of  $\alpha$ Syn platelet antiaggregating effect is proposed and the possible role of the protein at the interplay of amyloidosis and thrombosis is discussed.**

$\alpha$ -Synuclein ( $\alpha$ Syn) is a small (140 amino acids; ~14 kDa) acidic protein, highly conserved in vertebrates (1) and implicated in the pathogenesis of Parkinson's disease (PD) (2).  $\alpha$ Syn is a structurally disordered monomeric protein, either when isolated in solution (3) or in cellular environments, where it assumes a loosely packed, dynamic structure (4).  $\alpha$ Syn primary structure displays three distinctive regions (**Fig. 1**): i) the N-terminal region (NT, amino acids 1-60) is highly electropositive, and serves to preferentially localize  $\alpha$ Syn onto negatively charged biological membranes (5); ii) the central region, corresponding to the Non-Amyloid

## *$\alpha$ -Synuclein inhibits thrombin-induced platelets aggregation*

$\beta$ -Component (NAC, amino acids 61-95) is hydrophobic in nature and crucial for fibrillation (6); iii) the C-terminal region (CT, amino acids 96-140) displays high electronegative potential and is responsible of  $\alpha$ Syn binding to several target proteins (7). Upon prolonged incubation,  $\alpha$ Syn aggregates and forms amyloid fibrils (8), characterized by a cross- $\beta$ -sheet structure and stabilized by extensive hydrogen bonds network (9). The kinetics of  $\alpha$ Syn amyloid formation follows a nucleation-elongation mechanism (3) with a critical  $\alpha$ Syn concentration of 28  $\mu$ M, after 3-day incubation at 37°C in TBS, pH 7.5 (8). The lag phase of fibril formation is significantly shortened at higher  $\alpha$ Syn concentrations (10) and in crowded environments (11).

Clinical evidences indicate that  $\alpha$ Syn plays a major role in the pathogenesis of Parkinson's disease (PD) and the presence of  $\alpha$ Syn amyloid aggregates (i.e. Lewy bodies) in the dopaminergic neurons of the brain *substantia nigra* is a key neuropathological hallmark of PD (2,12,13). Whereas the role of  $\alpha$ Syn in the pathogenesis of PD is widely accepted (14,15), the physiological role of this protein is still elusive (16).  $\alpha$ Syn is abundantly present *in vivo* in the human central nervous system, in the nuclei of neuronal cells and presynaptic terminals, where it binds to synaptic vesicles and modulate vesicle homeostasis and synaptic plasticity (17). Beyond central nervous system, significant expression levels of  $\alpha$ Syn have also been measured in the cerebrospinal fluid (18,19), haematopoietic tissue (20,21) and blood (~1  $\mu$ M; ~15 mg/l) (22-25). The vast majority (>99%) of blood  $\alpha$ Syn is found in the erythrocytes (as absolute amount), while the remaining is split between plasma (0.1%), leukocytes (0.05%) and platelets (0.2%), where the latter are the main cellular hosts of  $\alpha$ Syn in the blood (23,26). Although  $\alpha$ Syn has been abundantly found in the cytoplasm of resting platelets, associated with the membrane of secretory  $\alpha$ -granules and the inner leaflet of the plasma membrane (20,23,24), little is known about the (extracellular) localization of the protein after platelets activation. Notably, exogenous  $\alpha$ Syn has been shown to pass across platelet plasma membrane and impair  $\alpha$ T-stimulated  $\alpha$ -granule release (27).

Platelets play a pivotal role in primary haemostasis, as they adhere to and are activated by subendothelial matrix proteins (i.e. collagen and von Willebrand factor) that become exposed after vascular injury, thus forming the primary platelet plug (28). Activated platelets then undergo dramatic

shape change, associated with dense and  $\alpha$ -granules secretion and inversion of plasma membrane polarity, accomplished *via* phosphatidylserine exposure, which is instrumental for coagulation factors complex assembly and activation (i.e. the tenase and prothrombinase complexes) during the amplification and propagation phases of  $\alpha$ T generation (28).

Noteworthy, thrombin ( $\alpha$ T) is the most potent activator of platelets *in vivo*, cleaving the exodomain of two G-protein-coupled receptors (GPCRs) on the platelets surface, i.e. type-1 and type-4 Protease Activated Receptors (PARs) (29). After cleavage, the newly generated N-termini act as intramolecular activators of PARs, finally leading to degranulation and morphological and functional changes typical of activated platelets (29). At variance with  $\alpha$ T, ADP activates platelets by directly interacting with P2Y<sub>12</sub> receptor (i.e. the major GPCR for ADP on platelets membrane), reducing cAMP concentration and increasing cytosolic Ca<sup>2+</sup>, with final platelets shape change and activation (30).

Starting from the notion that platelets are either the main cellular reservoir of  $\alpha$ Syn in the blood and, concomitantly, are the main cellular target of  $\alpha$ T procoagulant activity, we decided to investigate the possibility that  $\alpha$ Syn could modulate platelet activation by interfering with the  $\alpha$ T-PAR functional axis. Our results concurrently indicate that  $\alpha$ Syn functions as a negative regulator of  $\alpha$ T-mediated platelets activation, acting either directly, *via* competitive interaction with PAR1 in  $\alpha$ T binding, and indirectly, by scavenging  $\alpha$ T on platelets plasma membrane. The possible physiological implications of these findings will be also discussed.

## **Results**

### *Production and characterization of recombinant $\alpha$ Syn species*

Human full-length  $\alpha$ -synuclein ( $\alpha$ Syn, amino acids 1-140), the corresponding N-terminal 6xHis-tag derivative (6xHis- $\alpha$ Syn), the truncated species 6xHis- $\alpha$ Syn(1-96) and the fusion mutant protein  $\alpha$ Syn-GFP, in which the polypeptide chain sequence of the Green-Fluorescent Protein (GFP) was fused with  $\alpha$ Syn C-terminal end, were expressed in *Escherichia coli* cells, as previously detailed (31,32). For wild-type  $\alpha$ Syn and  $\alpha$ Syn-GFP protein mutant, the bacterial pellet was sonicated and then boiled for 10 min. After centrifugation, the supernatant enriched with  $\alpha$ Syn or  $\alpha$ Syn-GFP was

## *$\alpha$ -Synuclein inhibits thrombin-induced platelets aggregation*

dialyzed and further purified by RP-HPLC. At variance, 6xHis- $\alpha$ Syn and 6xHis- $\alpha$ Syn(1-96) were purified by immobilized metal ion affinity chromatography (IMAC), followed by RP-HPLC. The purity of  $\alpha$ Syn species was checked by SDS-PAGE and RP-HPLC (>98%), while their chemical identity established by high-resolution mass spectrometry, which was found in agreement with the protein amino acid composition within 20 ppm mass accuracy (**Supplementary Table S1 and Figure S1**). Monomerization of purified  $\alpha$ Syn was achieved by alkaline treatment, i.e. dissolution of  $\alpha$ Syn lyophilizate with NaOH solution, at pH 11.0, followed by addition of 0.1 M Tris-HCl, pH 7.0, down to pH 8.0 (33). The monomeric state of  $\alpha$ Syn preparation was confirmed by dynamic light scattering measurements (DLS), from which a hydrodynamic diameter ( $d_H$ ) of  $56 \pm 6$  Å was estimated, with a percent polydispersity (%PD) as low as 11.6% (**Supplementary Figure S1**), indicative of a monodispersed protein solution. Of note, the size of  $\alpha$ Syn reported in this study is lower than that predicted for a fully unfolded protein of 140 amino acids like  $\alpha$ Syn ( $d_H^U = 68$  Å), but nevertheless it compares favourably with that determined experimentally by small-angle X-ray scattering ( $d_H = 54 \pm 2$  Å) and size-exclusion chromatography ( $d_H = 55 \pm 6$  Å) (33), and is in keeping with the loosely packed, dynamic structure recently elucidated for monomeric  $\alpha$ Syn (4).

### *Inhibition of platelet aggregation by $\alpha$ Syn and its derivatives*

Multiple Electrode Aggregometry (MEA) was used to estimate the effect of full-length  $\alpha$ Syn and its N- and C-terminally truncated species on platelets aggregation induced in whole blood or isolated platelets by TRAP6,  $\alpha$ T or ADP (**Fig. 2**). Notably, TRAP6 is the synthetic hexapeptide SFLLRN-NH<sub>2</sub>, corresponding to the N-terminal segment of the tethered PAR1 region, acting as a potent and specific PAR1 agonist independently of  $\alpha$ T-induced proteolysis (34).

MEA is a fast and specific platelet-function-testing method (35), widely used in basic hematologic research and clinical testing, and enables to selectively measure aggregation of platelets, not only in isolation, as with classical light transmission aggregometry, but also in whole blood, which is the physiological environment where platelet function takes place *in vivo* (36). Indeed, the presence of erythrocytes and leukocytes in whole blood has been shown to influence platelet aggregation (36). The physical basis of MEA relays

on the increase of impedance (i.e. the electric resistance to the passage of alternate current in a medium between two platinum electrodes) which is caused by sticking and subsequent intercellular adhesion of activated platelets onto the electrodes (35,36). Quiescent platelets stick to the electrodes and self-organize in cell monolayers. At this stage, platelets-electrode interaction does not increase the impedance signal. Only after addition of a platelet aggregant (e.g.  $\alpha$ T, TRAP6, or ADP), activated platelets tightly adhere to the pre-existing monolayers on the electrodes, thus increasing blood electric impedance. For  $\alpha$ T-induced platelet activation, fibrin fibers, generated after addition of  $\alpha$ T to whole blood, might interact with activated platelets and further increase the impedance signal. To get a quantitative estimate of platelets aggregation, the time-dependent change of blood impedance is expressed as relative Aggregation Units (AU), where 8 AU approximately correspond to 1 Ohm ( $\Omega$ ). Integration of AU over time gives the value of the Area Under the Curve (AUC), which is taken as the best parameter of platelet function in MEA analysis (36).

Notably,  $\alpha$ Syn has been reported to interact with metal surfaces (e.g. stainless steel and gold) (37). This might in principle hinder binding of platelets to the electrode surface, thus reducing stimulated platelets aggregation in MEA measurements, compared to controls, with a resulting apparent (artefactual) higher antiaggregating effect of  $\alpha$ Syn. However, this possibility can be safely ruled out considering that: i)  $\alpha$ Syn binds to metal surfaces in the fibrillar state, not in the monomeric state (37); ii) the lag phase of  $\alpha$ Syn fibril formation, even in a crowded environment, is much longer (~3 h) than the time scale of MEA analysis (i.e. 6-10 min) (11); iii) finally, the tendency of  $\alpha$ Syn oligomers/polymers to stick on metal surfaces is 2-3 times lower than that measured for albumin (37), which is even much more concentrated in the blood (260-380  $\mu$ M) than the maximal  $\alpha$ Syn concentration explored in this study (20  $\mu$ M).

The data in **Fig. 2A-D** show that addition of full-length  $\alpha$ Syn to whole blood samples variably reduced, in a concentration-dependent manner, the platelet aggregation potential (%AUC) of all activators tested, where the strongest inhibitory effect was observed at 20  $\mu$ M  $\alpha$ Syn with TRAP6 activation (~90%), followed by  $\alpha$ T (~50%) and ADP (~20%). An IC<sub>50</sub> value of  $8.6 \pm 2.5$   $\mu$ M was estimated for the inhibition of  $\alpha$ Syn on TRAP6-



## *$\alpha$ -Synuclein inhibits thrombin-induced platelets aggregation*

induced activation. As a negative control, addition of  $\alpha$ Syn to whole blood, in the absence of TRAP6, does not induce any increase of AUC (**Fig. 2A**). To rule out the possibility that other cellular and soluble components, present in whole blood, might interfere with platelet aggregation, MEA analysis was also performed with platelets rich plasma (PRP) (**Fig. 2E,F**). Our data indicate that  $\alpha$ Syn (20  $\mu$ M) impairs  $\alpha$ T-induced platelet agglutination by about 50%, consistent with data obtained on whole blood (**Fig. 2C**). Noteworthy, the fact that  $\alpha$ Syn impairs platelets aggregation, also induced by TRAP6 binding to PAR1, suggests that  $\alpha$ Syn can directly interfere with PAR1 recognition, independently of  $\alpha$ T-induced proteolytic activation.

As reported in the Introduction,  $\alpha$ Syn is a small, disordered and acidic protein (pI 4.7) displaying a highly asymmetric charge distribution, with the N-terminal region strongly electropositive and the C-terminal tail strongly electronegative. Hence, to dissect the platelet anti-aggregating effect of  $\alpha$ Syn, MEA measurements were also carried out with recombinant 6xHis- $\alpha$ Syn(1-96) (pI 9.4) and the synthetic  $\alpha$ Syn(103-140) peptide (pI: 3.1) (**Fig. 2B-D**). Interestingly, the positively charged 6xHis- $\alpha$ Syn(1-96) retained the inhibitory effect of full-length  $\alpha$ Syn towards platelets activation triggered by TRAP6, while the inhibition of activation by ADP was even stronger than that observed with  $\alpha$ Syn. At variance, 6xHis- $\alpha$ Syn(1-96) impaired  $\alpha$ T-induced platelet activation to a lower extent compared to  $\alpha$ Syn. Noteworthy, and conversely to  $\alpha$ Syn and 6xHis- $\alpha$ Syn(1-96), the negatively charged  $\alpha$ Syn(103-140) displayed weak, if any, inhibitory potency in all platelet anti-aggregating assays tested (**Fig. 2B-D**).

### *Effect of $\alpha$ Syn on fibrin generation*

With the aim to investigate the possible effect of  $\alpha$ Syn on fibrin generation, another key process in blood coagulation, the time-course change of turbidity ( $\tau$ ) of a fibrinogen (Fb) solution was monitored after addition of  $\alpha$ T, in the presence of increasing  $\alpha$ Syn concentrations (**Fig. 3**).

Notably,  $\tau$  is the decrease in the intensity of transmitted light at 350 nm, caused by the scattering of light due to fibrin formation, and is measured as the apparent absorbance increase of a Fb solution. Typically, a fibrin clotting curve (i.e. the time-course increase of  $\tau$ ) displays a sigmoidal shape, with i) a lag phase, corresponding to the time necessary for the longitudinal elongation of protofibrils; ii) a linear rise of the turbidity signal,

resulting from lateral aggregation of protofibrils above a certain threshold length; and iii) a plateau, when most of protofibrils have been transformed into fibers, which then branch and assembly into the final fibrin network (38). From each clotting curve, the values of  $A_{\max}$  and  $t_c$  can be extracted, where  $A_{\max}$  is the maximum  $A_{350\text{nm}}$  value while  $t_c$  is the clotting time, defined as the time required for longitudinal elongation of fibrin fibers (see the legend to **Fig. 3**). Noteworthy, the value of  $A_{\max}$  provides a key geometric parameter of fibrin structure, as it is proportional to the square of the average diameter of the fibers (38).

The data shown in **Fig. 3** indicate that, in the presence of  $\alpha$ Syn,  $t_c$  remains essentially constant ( $109 \pm 5$  sec), whereas  $A_{\max}$  progressively increases up to ~17% at 10  $\mu$ M  $\alpha$ Syn (**Fig. 3, Inset**). These results suggest that  $\alpha$ Syn does not alter the lag phase of fibrin formation, when longitudinal fibrin polymerization occurs, while perturbing lateral aggregation to induce the formation of thicker fibers. These results can be explained considering that both longitudinal polymerization and lateral aggregation are variably influenced by charge-charge interactions, through which the “knobs” that are produced after fibrinopeptides release on one fibrin monomer interact with the “holes” present on another monomer (39). Therefore, it is not surprising that a highly charged protein like  $\alpha$ Syn can interfere with fibrin structure. Noteworthy, a similar increase of  $A_{\max}$  was observed in fibrin generation experiments at high ionic strength or in the presence of positively charged proteins, such as platelet factor-4 (pI: 8.9) (38).

### *Effect of $\alpha$ Syn on $\alpha$ T-catalyzed substrate hydrolysis*

$\alpha$ Syn was incubated with  $\alpha$ T and then the protease hydrolytic activity was measured with specific substrates, including (D)-Phe-Pip-Arg-*p*-nitroanilide (S2238), fibrinogen (Fb), and the synthetic peptide PAR1(38-60) encompassing PAR1 activation domain.

The kinetics of *p*-nitroaniline release (**Fig. 4A**) clearly indicate that  $\alpha$ Syn, up to the highest concentration explored (15  $\mu$ M), does not appreciably affect the rate of S2238 hydrolysis and, furthermore, identical results were obtained with the same concentration of  $\alpha$ Syn(103-140) (not shown). Likewise, the release of fibrinopeptides (i.e. FpA and FpB) from a fibrinogen solution was not affected by 15  $\mu$ M  $\alpha$ Syn, as documented by the invariance of the specificity constants ( $k_{\text{cat}}/K_m$ ), extracted from the data in **Fig. 4B**. Noteworthy,  $\alpha$ Syn (15  $\mu$ M) was found to reduce by 2-fold the

## *$\alpha$ -Synuclein inhibits thrombin-induced platelets aggregation*

efficiency of PAR1(38-60) hydrolysis by  $\alpha$ T (**Fig. 4C**), where the latter peptide reproduces the substrate binding properties of PAR1 extracellular domain on platelets, as it contains both the exosite-1 binding sequence for  $\alpha$ T and the scissile bond Arg<sup>41</sup>-Ser<sup>42</sup>.

### *Probing $\alpha$ Syn- $\alpha$ T interaction by fluorescence spectroscopy and surface plasmon resonance (SPR)*

The interaction of  $\alpha$ Syn with  $\alpha$ T was monitored by steady state fluorescence change and SPR, two orthogonal techniques exploiting different physico-chemical observables.  $\alpha$ Syn- $\alpha$ T interaction was also probed by isothermal titration calorimetry, which however yielded a very low heat exchange, too small to obtain a reliable equilibrium affinity constant (not shown).

A first evidence of  $\alpha$ Syn- $\alpha$ T complex formation came from fluorescence emission spectra (**Fig. 5A**), obtained after excitation at 295 nm, indicating that addition of  $\alpha$ Syn (20  $\mu$ M, final concentration) to a  $\alpha$ T solution (70 nM, final concentration) reduced by ~10% the fluorescence intensity of the solution, compared to the theoretical sum-spectrum of both isolated  $\alpha$ T and  $\alpha$ Syn at the same concentrations, without appreciably altering the wavelength of maximum emission ( $\lambda_{\max}$ ), i.e. 334 nm. The fluorescence change associated with  $\alpha$ Syn- $\alpha$ T coupling is likely caused by changes in the environment of some Trp-residues in  $\alpha$ T structure. Indeed,  $\alpha$ T contains nine tryptophan fluorophores, whereas  $\alpha$ Syn has only four Tyr-residues, which do not (or only negligibly) absorb at 295 nm and, therefore, are not expected to contribute to the emitted fluorescence. A quantitative estimate of  $\alpha$ Syn- $\alpha$ T interaction was obtained by recording the decrease of  $\alpha$ T fluorescence at  $\lambda_{\max}$  at increasing  $\alpha$ Syn concentrations (**Fig. 5B**). Interpolation of the data points with eq. 4, describing a stoichiometric 1:1 binding model, yielded an equilibrium dissociation constant ( $K_d$ ) of 0.96  $\mu$ M.

Thereafter, SPR measurements were carried out by immobilizing the N-terminally 6xHis-tagged  $\alpha$ Syn onto a Ni<sup>2+</sup>/nitrilotriacetate sensor chip, *via* non-covalent chelation, and injecting incremental concentrations of S195A in the mobile phase (**Fig. 5C,D**). The catalytically inactive S195A thrombin mutant was used, as active  $\alpha$ T was shown to cleave the fused 6xHis- $\alpha$ Syn at Lys6, but not the untagged wild-type  $\alpha$ Syn 1-140 (**Supplementary Fig. S2**). SPR data were analyzed according to the one-site binding model (eq. 5), yielding a  $K_d$  of 44 nM. Notably, the affinity of  $\alpha$ T for immobilized  $\alpha$ Syn

was >20-fold higher than that estimated by fluorescence binding experiments. Overestimation of binding strength in protein-protein interactions is frequent in SPR measurements, compared to other spectroscopic techniques (e.g. fluorescence), and it is inherently associated to the beneficial lower loss of binding entropy ( $\Delta S_b$ ) occurring in a biphasic interacting system like SPR, where one of the two partners is immobilized on the sensor chip (40,41). This is especially true for an intrinsically unfolded protein like  $\alpha$ Syn, which becomes “more ordered” after immobilization on the sensor chip, with a resulting favorable reduction of  $\Delta S_b$ , compared to the solution phase where both interacting partners are “free” in solution and therefore undergo a larger (unfavorable) entropy loss of binding (40).

Altogether, both fluorescence and SPR measurements concurrently indicate that  $\alpha$ Syn binds to  $\alpha$ T with a moderate to high affinity, depending on the binding system investigated.

### *Molecular mapping of $\alpha$ Syn- $\alpha$ T interaction*

To identify the region of  $\alpha$ Syn responsible of  $\alpha$ T binding, we measured the affinity of  $\alpha$ Syn(103-140) for  $\alpha$ T by steady state fluorescence spectroscopy (**Fig. 5B**). Our data indicate that  $\alpha$ Syn(103-140) binds to  $\alpha$ T with an affinity very similar ( $K_d = 1.25 \mu$ M) to that of full-length  $\alpha$ Syn ( $K_d = 0.96 \mu$ M), suggesting that the negatively charged C-terminal tail of  $\alpha$ Syn is the protein binding epitope for  $\alpha$ T.

Next, we mapped the sites on  $\alpha$ T structure that are involved in the interaction with  $\alpha$ Syn. The active site and two positively charged patches, namely exosites 1 and 2, are the hot spots on  $\alpha$ T responsible for the recognition of most physiological substrates and inhibitors (42-44). The role played by these regions in binding to  $\alpha$ Syn was assessed using “the site-specific perturbation approach”, earlier exploited in our laboratory in the study of  $\alpha$ T interactions (41,45-48). Here, the effect of saturating concentrations of  $\alpha$ Syn on the affinity of selected ligands, which are known to specifically bind to a given target site on  $\alpha$ T structure (e.g. the active site, exosite 1 or 2), was measured. The decrease in binding strength for a given site-specific ligand was taken as a strong indication that the target site is involved in binding to  $\alpha$ Syn. Furthermore, we used thrombin derivatives in which one of the key binding sites was selectively perturbed by proteolytic nicking [i.e.  $\beta_T$ -thrombin ( $\beta_T$ T)] or intramolecular masking [i.e. prothrombin (ProT)]. Once again, a drop in binding affinity

### *$\alpha$ -Synuclein inhibits thrombin-induced platelets aggregation*

provides evidence for the involvement of the perturbed region in the interaction with  $\alpha$ Syn.

**Active Site.** To check whether the active site region of  $\alpha$ T is involved in  $\alpha$ Syn binding, the affinity of ligands/inhibitors of incremental size and mapping different  $\alpha$ T subsites [i.e. *p*-aminobenzamidine (PABA), the chromogenic substrate S2238, and hirudin fragment 1-47] was measured in the absence and presence of 20  $\mu$ M  $\alpha$ Syn. PABA, a small fluorescent inhibitor of chymotrysin-like proteases, interacts with the substrate primary specificity site (S1) of  $\alpha$ T and, after binding, emits more intensely at 375 nm. The  $\alpha$ T-specific substrate S2238 extensively interacts with the protease recognition sites (49) and its affinity for the catalytically inactive thrombin mutant S195A was determined by fluorescence resonance energy transfer measurements, where the *p*-nitroanilide moiety of S2238 functions as the energy acceptor while the Trp-residues of S195A act as the energy donors (45). Hirudin fragment 1-47, i.e. Hir(1-47), is a potent thrombin inhibitor covering the active site and the loop regions nearby and, upon binding to  $\alpha$ T, induces an increase of the protease fluorescence emission (50).

The data in **Fig. 6** indicate that  $\alpha$ Syn only marginally alters the affinity of all active-site specific ligands tested, suggesting that the  $\alpha$ T catalytic site is not significantly involved in  $\alpha$ Syn binding. These data are consistent with the observation that  $\alpha$ Syn has no effect on the hydrolysis rate of S2238 by  $\alpha$ T (**Fig. 4**).

**Exosites 1 and 2.** The involvement of  $\alpha$ T exosites in binding to  $\alpha$ Syn was probed by fluorescence binding measurements, measuring the affinity of exosite-specific ligands for the protease in the absence and presence of  $\alpha$ Syn or  $\alpha$ Syn(103-140). Hirugen (i.e. the C-terminal peptide 54-65 of hirudin HV1) was selected as a safe exosite-1 binder (41,43), while the fibrinogen  $\gamma'$ -peptide (i.e. the C-terminal peptide 408-427 of fibrinogen elongated  $\gamma$ -chain splice variant) was used as a specific exosite-2 ligand (51,52). Full-length  $\alpha$ Syn and  $\alpha$ Syn(103-140) decreased the affinity of the  $\gamma'$ -peptide for  $\alpha$ T by about 3- and 4-fold (**Fig. 7C,D**), respectively, but they were not able to reduce the affinity of hirugen for exosite 1 (**Fig. 7A,B**). A similar conclusion was drawn from displacement experiments (41,46), showing that neither  $\alpha$ Syn nor  $\alpha$ Syn(103-140) were able to displace N<sup>α</sup>-fluoresceinated hirugen, [F]-hirugen, from  $\alpha$ T exosite 1 (**Fig. 7E**).

The role of  $\alpha$ T exosites in  $\alpha$ T- $\alpha$ Syn interaction was further investigated by SPR, whereby the

binding strength of thrombin species (i.e.  $\beta$ <sub>T</sub>T and ProT), having the exosites variably compromised, to immobilized 6xHis- $\alpha$ Syn was measured (**Fig. 8**).  $\beta$ <sub>T</sub>T results from proteolytic nicking of mature  $\alpha$ T by trypsin at the peptide bond Arg77a-Asn78, leading to disruption of exosite-1, whereas the active site and exosite 2 retain the structural and functional properties of the corresponding regions in mature  $\alpha$ T (49) (**Fig. 8A**). ProT is the physiological zymogen precursor of  $\alpha$ T and, compared to  $\alpha$ T, major structural perturbations occur in the Na<sup>+</sup>-binding site, the activation domain and the insertion loops surrounding the catalytic cleft (47). Importantly, exosite-1 structure seems to be only slightly altered in the zymogen structure, whereas the reactivity of exosite 2 is completely abolished because of intramolecular tight binding of the zymogen kringle-2 domain (**Fig. 8A**). Analysis of binding data (**Fig. 8B**) shows that disruption of exosite 1, as in  $\beta$ <sub>T</sub>T, reduces the affinity for 6xHis- $\alpha$ Syn by only 1.5-fold, whereas masking of exosite 2, as in ProT, leads to a dramatic drop in binding strength by 37-fold. These findings highlight the role of exosite 2 in  $\alpha$ Syn- $\alpha$ T interaction, as masking/perturbation of exosite 2 results in a drop of the affinity of  $\alpha$ Syn for thrombin, whereas masking/perturbation of exosite 1 is essentially not relevant.

Altogether, the results of molecular mapping experiments, conducted by fluorescence and SPR measurements on the  $\alpha$ Syn- $\alpha$ T interacting system, concurrently indicate that  $\alpha$ Syn uses its negative C-terminal tail 103-140 to interact with the electropositive exosite 2 of  $\alpha$ T.

#### *Probing $\alpha$ Syn membrane localization in resting and activated platelets by fluorescence microscopy*

Platelets activation is characterized by the exposure of anionic phosphatidylserine from the inner to the outer leaflet of the plasma membrane, providing a negative binding surface for coagulation factors complex assembly and activation during the burst phase of  $\alpha$ T generation (28).  $\alpha$ Syn is abundantly present in the cytoplasm of resting platelets, associated with the membrane of secretory  $\alpha$ -granules and the cytoplasmic leaflet of the plasma membrane (20,23,24). Furthermore, *in vitro* studies indicate that the positive NT drives binding of  $\alpha$ Syn to negatively charged membranes (5), where it folds in an  $\alpha$ -turn- $\alpha$  motif, whereas the negative CT fluctuates outside the plasma membrane and remains largely unfolded, due to intramolecular charge repulsion and the presence of



five secondary structure-destabilizing prolines (**Fig. 1**). Nevertheless, direct experimental data on the extracellular localization of  $\alpha$ Syn on activated platelets is still lacking.

To fill this gap, exogenous  $\alpha$ Syn-GFP, i.e. recombinant  $\alpha$ Syn fused at the C-terminal end with the green-fluorescent protein (GFP) (31,32), was added to resting and TRAP6 activated platelets and plasma membrane binding was studied by fluorescence microscopy. Furthermore, localization of endogenous  $\alpha$ Syn, before and after TRAP6 stimulation, was studied by immunofluorescence microscopy using a mouse anti-human  $\alpha$ Syn monoclonal primary antibody, namely  $\alpha$ -synuclein(211) recognizing  $\alpha$ Syn 121-125 sequence, and an Alexa Fluor 594-conjugated goat anti-mouse IgG, as a secondary antibody.

Time-lapse fluorescence microscopy images of seeded platelets ( $20 \times 10^6$  platelets/well) indicate that  $\alpha$ Syn-GFP preferentially adheres, in a concentration dependent manner (0-2.0  $\mu$ M), to activated platelets, compared to resting platelets (**Fig. 9A**). This result was confirmed in a separate experiment, where platelets ( $16 \times 10^6$  platelets/well) were fixed with paraformaldehyde, before and after TRAP6 stimulation. The micrographs in **Fig. 9B** indicate that  $\alpha$ Syn preferentially localizes on the plasma membrane of TRAP6-activated platelets. Finally, immunofluorescence microscopy was used to detect the exposure of endogenous  $\alpha$ Syn on the plasma membrane of resting and activated platelets ( $16 \times 10^6$  platelets/well). Our data indicate that a basal expression of  $\alpha$ Syn on the plasma membrane is present even in resting platelets and that this expression is substantially increased after stimulation with TRAP6 (**Fig. 9C**).

#### *Electrostatic properties of $\alpha$ Syn, $\alpha$ T, and platelet receptors*

With the aim to rationalize on simple physical grounds the  $\alpha$ T binding properties of  $\alpha$ Syn and its platelets antiaggregating effect, we decided to investigate the electrostatic properties of  $\alpha$ Syn and its interacting partners (i.e.  $\alpha$ T and platelet receptors PAR1, PAR4 and P2Y<sub>12</sub>R), using the APBS software (53).

$\alpha$ Syn is a small acidic protein (pI 4.7) that, at physiological plasma pH, contains 16 positive and 25 negative charges (comprising the N- and C-termini), which account for about 30% of the protein amino acid content and actually impair  $\alpha$ Syn to acquire a stable folded structure in solution (3). The unique electrostatic properties of the protein are

self-evident from its amino acids sequence (**Fig. 1**), as the N-terminal (NT) region (1-60) contains an excess of seven positive charges, whereas the C-terminal (CT) region (96-140) is strongly negative with an excess of 12 negatively charged amino acids. The central NAC region 61-95, driving protein aggregation and fibrillogenesis, is highly hydrophobic and only slightly positive, with one positive charge in excess.

Even  $\alpha$ T displays a non-uniform electrostatic potential, generated by a highly asymmetric distribution of positive and negative amino acids on the protease structure (**Fig. 10A**), whereby exosite 1 and 2 are strongly positive whereas the Na<sup>+</sup>-binding site and the active site region are negatively charged, with the catalytic pocket surrounded by a “negative ring” of Asp- and Glu-residues (47). Although both exosites display positive electrostatic potential, exosite 2 is more electropositive and ligand binding is mainly driven by “less specific” electrostatic complementarity, whereas exosite 1, beyond electrostatics, has “more specific” hydrophobic and stereochemical requirements for interaction (42-44).

Electrostatic potential calculations (**Fig. 10**), carried out on the crystallographic structure of PAR1 (54) and P2Y<sub>12</sub>R (55) and on the modelled structure of PAR4 (see Methods), indicate that the cytoplasmic region of all these receptors is always electropositive, whereas the extracellular region is strongly electronegative in PAR1 (**Fig. 10B**) and substantially electropositive in both PAR4 (**Fig. 10C**) and P2Y<sub>12</sub>R (**Fig. 10D**), with only some interspersed negative spots. As expected, the transmembrane regions, in contact with the membrane phospholipids apolar chains, are essentially neutral in all the receptors investigated. Besides the different charge distribution, PAR1 differs from PAR4 and P2Y<sub>12</sub>R in the binding mode to agonist/antagonist molecules. Indeed, whereas PAR1 ligands mainly exploit receptor electrostatic complementarity and interact with superficial structures rather than penetrating deeply into the receptor core (54), ligand binding to P2Y<sub>12</sub>R (55) and PAR4 (56) is more “stereochemically demanding” and it is mainly driven by orientation-dependent interactions, e.g. van der Waals interactions and hydrogen bonds.

#### **Discussion**

This study follows our previous work aimed at identifying novel biochemical pathways at the interface of thrombosis (41,48,57,58) and amyloidosis (59).

## *$\alpha$ -Synuclein inhibits thrombin-induced platelets aggregation*

Using MEA analysis on whole blood samples and isolated platelets, here we have shown that  $\alpha$ Syn primarily impairs activation of platelets induced by TRAP6 (up to ~90%) and  $\alpha$ T (up to ~50%) and, to a minor extent, by ADP (up to ~20%) (**Fig. 2**). Using several different molecular probes (i.e. PABA, S2238, Hir(1-47), hirugen and [F]-hirugen,  $\gamma$ '-peptide, thrombin S195A mutant,  $\beta$ T and ProT) and techniques (i.e. fluorescence and SPR) we have also demonstrated that  $\alpha$ Syn preferentially binds to  $\alpha$ T exosite 2 through its negative C-terminal tail  $\alpha$ Syn(103-140), without appreciable involvement of exosite 1 and active site (**Figs. 5-8**). Neither fibrinopeptides release nor S2238 hydrolysis was influenced by  $\alpha$ Syn (15  $\mu$ M), while the efficiency of PAR1(38-60) cleavage was only moderately reduced by 2-fold (**Fig. 4**). Finally, fluorescence microscopy data indicate that resting platelets basally express endogenous  $\alpha$ Syn on the plasma membrane and that this expression is enhanced after stimulation with TRAP6. Likewise, exogenous  $\alpha$ Syn adheres in a concentration dependent manner and to a greater extent to activated compared to resting platelets (**Fig. 9**).

From the comparison of platelets antiaggregating effect of full-length  $\alpha$ Syn with that of its constituent peptides  $\alpha$ Syn(1-96) and  $\alpha$ Syn(103-140) (**Fig. 2B-D**), it is possible to conclude that: i) the positively charged N-terminal region  $\alpha$ Syn(1-96) is required for  $\alpha$ Syn anti-aggregating activity; ii) the negative C-terminal region  $\alpha$ Syn(103-140) *per se* does not have any direct anti-aggregating effect; iii) the presence of  $\alpha$ Syn(103-140) has a variable effect, either positive or negative, on  $\alpha$ Syn anti-aggregating function, depending on the specific functional assay tested.

### *Electrostatic model of $\alpha$ Syn platelets antiaggregating activity*

Electrostatic charge-charge interactions play a pivotal role in the biochemistry of blood coagulation, as exemplified by the reversal of membrane charge polarization following platelet activation (see above) (28) or by the proteolytic activation of zymogens in the coagulation cascade (49), whereby active site formation in the mature protease is driven by the energy released after formation of a high-energy salt bridge between the newly generated N-terminus and a conserved Asp-residue in the activation domain. More specifically, proteolytic activation of platelet PAR1 by  $\alpha$ T entails coupling of the enzyme electropositive exosite 2 with the highly negative C-terminal tail (amino

acids 268-282) of platelet GpIb $\alpha$  receptor. This interaction serves to localize  $\alpha$ T on the platelet surface and steer the electropositive  $\alpha$ T exosite 1 for productive interaction with the negative region of PAR1 exodomain (<sup>53</sup>EPFWEDEE<sup>60</sup>), allowing PAR1 scissile R<sup>41</sup>-S<sup>42</sup> bond to enter the protease active site and be efficiently cleaved (60). After cleavage, the tethered positive ligand <sup>42</sup>SFLLRN<sup>47</sup>— newly generated, couples with the negative extracellular receptor surface and triggers intracellular signalling (54). The mechanism of PAR4 proteolytic activation is very similar to that of PAR1, even though a negative patch in the receptor extracellular loop-2 region has been proposed for binding to  $\alpha$ T exosite 2 (60).

The results reported above allow to propose that  $\alpha$ Syn may function as a negative regulator of  $\alpha$ T-mediated platelets activation, acting either directly, *via* competitive binding to PAR1, and indirectly, by scavenging  $\alpha$ T on the plasma membrane.  $\alpha$ Syn modulatory function may be accomplished mainly through charge-charge interactions (see below), acting long-range as an “electrostatic filter” to favor or disfavor binding to different platelet receptors. This should not be surprising, as  $\alpha$ Syn contains ~30% of charged amino acid residues in its sequence. Although  $\alpha$ Syn has a total net negative charge (pI: 4.7), the positive N-terminal and the negative C-terminal regions can interact independently, according to their specific charge state (5).

According to the model depicted in **Fig. 11**, free plasma  $\alpha$ Syn, or  $\alpha$ Syn released from activated platelets after PAR1 cleavage and  $\alpha$ -granules secretion, can interact through its positive NT with the highly negative PAR1 extracellular domain (**Fig. 10B**) and prevent  $\alpha$ T binding/activation. Concomitantly, other  $\alpha$ Syn molecules can adhere to, *via* NT binding, and become concentrated (15,17) on the negative (phosphatidylserine rich) outer leaflet of activated platelets plasma membrane while the disordered/flexible negative C-terminal tail can favorably couple with the electropositive  $\alpha$ T exosite 2 (**Fig. 10A**) to scavenge the protease and thus down-regulating platelets activation. Intriguingly, this scavenging effect may be particularly efficient if one considers that the affinity of  $\alpha$ T for chip-immobilized  $\alpha$ Syn is the medium nanomolar range ( $K_d = 44$  nM) (**Fig. 5D**).

The model also explains on simple electrostatic grounds how high  $\alpha$ Syn concentrations can completely inhibit platelet activation by TRAP6 (**Fig. 2B**), whereas at the same  $\alpha$ Syn concentrations



## *$\alpha$ -Synuclein inhibits thrombin-induced platelets aggregation*

$\alpha$ T still has a significant, residual aggregating activity (~45%). Conversely to PAR1, in fact, PAR4 extracellular domain is electropositive (**Fig. 10C**) and therefore it is not expected to interact with (and be inhibited by) the positive  $\alpha$ Syn N-terminal region. Hence, the residual platelets activating function of  $\alpha$ T, measured in the presence of  $\alpha$ Syn, can be reasonably assigned to the proteolytic activation of PAR4 by free  $\alpha$ T molecules. Similar considerations also hold for explaining the poor antiaggregating effect of  $\alpha$ Syn on ADP-induced activation (**Fig. 2D**). P2Y<sub>12</sub>R extracellular surface is indeed mainly electropositive, with only some interspersed negative spots, resulting in charge-charge repulsion with the positive  $\alpha$ Syn NT. Furthermore, some sequestration of the negative ADP<sup>-3</sup> agonist by the electropositive NT in the full-length  $\alpha$ Syn cannot be ruled out (see below).

The “electrostatic model” highlighted above also provides reasonable explanation for the different platelets antiaggregating functions of  $\alpha$ Syn(103-140) and 6xHis- $\alpha$ Syn(1-96) in different platelets stimulation assays (**Fig. 2B-D**). When isolated, the negative  $\alpha$ Syn(103-140) does not affect platelets activation by TRAP6,  $\alpha$ T or ADP<sup>-3</sup>, likely because of electrostatic repulsion with the negative PAR1 exodomain surface and poor stereochemical fit with PAR4 and P2Y<sub>12</sub>R (see Results). Likewise, binding of  $\alpha$ Syn(103-140) to  $\alpha$ T is driven by the electrostatic complementarity with the positive exosite 2 of the protease, while the bound peptide does not impair  $\alpha$ T to cleave and activate PAR1 and PAR4. Noteworthy, 6xHis- $\alpha$ Syn(1-96) has a variable (even opposite) effect on the platelets activation assays explored in this work. In the TRAP6 activation test, 6xHis- $\alpha$ Syn(1-96) faithfully reproduces PAR1 inhibitory properties of intact  $\alpha$ Syn, thus strongly supporting our hypothesis that NT may directly bind to and competitively inhibit PAR1 activation induced by TRAP6. When tested in the  $\alpha$ T-activation assay,  $\alpha$ Syn(1-96) displays a reduced antiaggregating activity, compared to full-length  $\alpha$ Syn, consistent with the lack of the C-terminal tail 103-140 which, in the membrane-bound  $\alpha$ Syn, is responsible of  $\alpha$ T scavenging. Rather surprisingly, the antiaggregating effect of  $\alpha$ Syn(1-96) is much increased in the ADP-activation test. This is likely caused by  $\alpha$ Syn(1-96) binding of ADP<sup>-3</sup> agonist, reducing the concentration of the agonist available for activating P2Y<sub>12</sub>R. This effect is much more pronounced with  $\alpha$ Syn(1-96) than with full-length  $\alpha$ Syn, as the former has a much higher positive charge density

(pI: 9.4) compared to intact  $\alpha$ Syn (pI: 4.7), where the presence of the negative C-terminal tail (pI: 3.1) could interfere with ADP binding. This interpretation is consistent with the known affinity of small/disordered electropositive nucleoproteins (e.g. histones and protamines) for (poly)nucleotides (61) and with very recent data showing that 12  $\mu$ M protamine (51 amino acids, pI: 12), antagonises ADP activation of platelets (62). In the latter case, however, no mechanistic insight has been provided.

### *Blood $\alpha$ Syn in health and disease*

Although several different activities have been reported for  $\alpha$ Syn (e.g. modulation of exocytosis/endocytosis, histone and metal binding, and cellular ferrireductase activity), the normal physiological function of this protein still remain to be fully elucidated (16).  $\alpha$ Syn has been identified in all cellular components of the haematopoietic system (20,21) and in the blood (19,22-24) and recent findings, obtained with  $\alpha$ Syn<sup>-/-</sup> knockout mice, indicate that the protein plays an important role in normal function of these cells (25). Interestingly, platelets are the main hosts of  $\alpha$ Syn in the blood, containing 264±36 ng of  $\alpha$ Syn *per* mg of total protein compared to 131±23 ng of the erythrocytes (23,26), while  $\alpha$ Syn levels increase during differentiation of megakaryocytes to platelets. Altogether these findings have widened our understanding of  $\alpha$ Syn function outside the CNS and, noteworthy, add more weight to our proposal that haematic  $\alpha$ Syn can act as a modulator of platelet activation *in vivo* by interfering with the  $\alpha$ T-PAR1 functional axis. Intriguingly, platelets also express high levels of other amyloid-related proteins, such as the amyloid precursor protein (APP) and A $\beta$ (1-42) fragment (63), and  $\beta$ 2-microglobulin ( $\beta$ 2M) (64), which are heavily involved in the onset of Alzheimer’s disease (i.e. APP and A $\beta$ ) and neurocognitive decline (i.e.  $\beta$ 2M). Noteworthy, elevated plasma levels of either A $\beta$  or  $\beta$ 2M are positively related to higher incidence of thrombosis (63,64).

The platelet antiaggregating function, herein proposed for  $\alpha$ Syn, is keeping with earlier *in vitro* results suggesting that the protein is related to blood anticoagulant pathways *in vivo*. For instance, exogenous  $\alpha$ Syn has been shown to pass across the plasma membrane and impair calcium-dependent release of  $\alpha$ -granules from platelets (27), and to act as a negative regulator of the exocytosis of von Willebrand factor (vWF) from vascular endothelial cells (65), where vWF recruits and activates platelets in primary haemostasis (28). Importantly,

## *α-Synuclein inhibits thrombin-induced platelets aggregation*

the lack of platelet  $\alpha$ Syn, as in  $\alpha$ -syn<sup>-/-</sup> knockout mice, results in a hypercoagulable phenotype (25,66).

Our results are also consistent with *in vivo* procoagulant and anticoagulant clinical settings where  $\alpha$ Syn levels are either decreased (i.e. aging) or increased (i.e. PD) and for which an opposite trend of thrombotic events have been observed. Although it is difficult to establish a direct causative link between the concentration of a given (protein) molecule and the onset of a complex multifactorial physio-pathological state, blood  $\alpha$ Syn levels are markedly decreased in elderly people (67) and aging is widely recognized as a primary risk factor for thrombosis (68). On the other hand, very recent data indicate that  $\alpha$ Syn plasma concentration (but not platelet or erythrocyte  $\alpha$ Syn levels) is >20-fold higher in PD patients than in healthy individuals (69) and, as a matter of fact, earlier studies seem to indicate that ischemic stroke, myocardial infarction or coronary arterial disease are significantly less frequent in PD patients than in healthy controls (70-72) while platelets from PD patients are less sensitive to aggregating agents like  $\alpha$ T and ADP (73). Even though epidemiologic and neurochemical facets of Parkinson's disease might allow to envisage some benefit or protection against thrombotic events, other studies suggest that the prevalence of thrombotic disorders is higher in PD patients than in controls (74,75). The results of these studies, however, are likely affected by a confounder bias, as the enrolled PD patients had a history of anti-Parkinson medication with Levodopa, known to increase plasma levels of homocysteine which is recognized as thrombotic risk factor (76). Noteworthy, in a retrospective case-control study, newly diagnosed PD patients at early disease stage (not treated with Levodopa) were characterized by a significantly lower prevalence of vascular risk factors than matched controls (77).

In conclusion, the results reported in this study put forward a novel physiological function of  $\alpha$ Syn, which unfolds outside the CNS, to downregulate  $\alpha$ T-induced platelet activation. Further studies are needed to address the impact of  $\alpha$ Syn antiaggregating function, in comparison with that of other platelet-derived amyloidogenic proteins (i.e. APP/A $\beta$  and  $\beta$ 2M), at the interplay of amyloidosis and thrombosis.

## **Experimental procedures**

### *Reagents*

Human plasma  $\alpha$ T (EC 3.4.21.5) and ProT were purchased from Haematologic Technologies (Essex

Junction, VT, USA). Ecarin from *Echis carinatus* venom, bovine pancreas trypsin, human plasma fibrinogen, Ac-Tyr-NH<sub>2</sub>, Ac-Phe-NH<sub>2</sub>, fluorescein isothiocyanate and PABA were purchased from Sigma (St. Louis, MO, USA). The chromogenic substrate S2238 was from Chromogenix (Milan, Italy). Hirugen (<sup>54</sup>GDFEEIPEEY\*LQ<sup>65</sup>) and [F]-hirugen (46), fibrinogen  $\gamma'$ -peptide (<sup>408</sup>VRPEHPAET EY\*DSL Y\*PEDDL<sup>427</sup>) (78), PAR1(38-60) (<sup>38</sup>LDPR $\downarrow$ SFLLRNPNDKYEPFWEDDE<sup>60</sup>) (45), Hir(1-47) (79), and  $\alpha$ Syn(103-140) were synthesised by standard N<sup>α</sup>-fluorenylmethyloxycarbonyl solid-phase chemistry on a PS3 automated synthesizer (Protein Technologies Int., Tucson, AZ, USA), purified to homogeneity (>98%) by semipreparative RP-HPLC, and characterized by high-resolution mass spectrometry. Notably, Y\* indicate phosphorylated Tyr-residues. N<sup>α</sup>-Fmoc-protected amino acids, solvents and reagents for peptide synthesis were purchased from Applied Biosystems (Forster City, CA, USA) or Bachem AG (Bubendorf, Switzerland). Salts, solvents and other reagents were of analytical grade and purchased from Sigma or Fluka (Darmstadt, Germany).

### *Production and characterization of recombinant αSyn species*

All recombinant human synuclein derivatives (i.e.  $\alpha$ Syn, 6xHis- $\alpha$ Syn, 6xHis- $\alpha$ Syn(1-96), and  $\alpha$ Syn-GFP), were produced as previously detailed (31,32). Briefly, BL21\*(DE3) pLysS *Escherichia coli* cells were transformed, using the heat-shock method, with pRSET-B plasmid containing human  $\alpha$ Syn gene and selected on a Luria-Bertani (LB) Agar Amp<sup>+</sup> (0.1 mg/ml) solid culture medium overnight. Transformed cells were grown at 37°C in LB Broth Amp<sup>+</sup> (0.05 mg/ml) and induced (O.D. = 0.6) with isopropyl  $\beta$ -D-1-thiogalactopyranoside (IPTG, 0.1 mg/ml) under vigorous shaking. For  $\alpha$ Syn and  $\alpha$ Syn-GFP, after 3-h induction with IPTG, bacteria were harvested by centrifugation (6.000 rpm, 15 min, at 4°C), and the pellet sonicated in 40 mM Tris-HCl, pH 8.0, 0.1 M NaCl (buffer A). After 10-min boiling, the suspension was centrifuged (12.000 rpm, 10 min, 4°C). The supernatant, containing soluble  $\alpha$ Syn or  $\alpha$ Syn-GFP, was dialyzed overnight at 4°C against buffer A, containing 2 mM EDTA. For 6xHis- $\alpha$ Syn and 6xHis- $\alpha$ Syn(1-96), after sonication in buffer A, the recombinant proteins was purified by IMAC. The bacterial lysis supernatant (50 ml) was loaded onto a fast-flow Ni<sup>2+</sup>-IMAC (1 x 3 cm) HiTrap column,

## *$\alpha$ -Synuclein inhibits thrombin-induced platelets aggregation*

using a model P-1 peristaltic pump (Pharmacia, Uppsala, Sweden) at a flow-rate of 0.1 ml/min. The flow-through was discarded and the column connected to an Äkta-purifier system (Marlborough, MA, USA). After washing with buffer A (60 ml), 6xHis-tagged proteins were eluted from the column (0.5 ml/min) with buffer A, pH 6.5, containing 0.4 M imidazole. The material eluted in correspondence of the major chromatographic peak was collected and dialyzed overnight at 4°C against phosphate buffered saline, pH 7.4. Recombinant proteins were further purified by RP-HPLC on a C18 semi-preparative column (10 x 250 mm, 5 $\mu$ m, 300Å) from Grace-Vydac (Hesperia, CA, USA), eluted with a linear acetonitrile-0.078% trifluoroacetic acid gradient at a flow rate of 1.5 ml/min. After lyophilisation, recombinant proteins in water:acetonitrile (1:1 v/v), containing 1% formic acid were characterized by high-resolution mass spectrometry using a Waters (Milford, MA, USA) Xevo-G2S Q-TOF spectrometer. To obtain purified  $\alpha$ Syn in the monomeric state, the lyophilized protein (1 mg) was dissolved in 2 mM NaOH (100  $\mu$ l) and 1 M NaOH (10  $\mu$ l), up to pH 11.0. After centrifugation (15.000 rpm, 15 min), the supernatant was withdrawn and added with 0.1 M Tris-HCl, pH 7.0 (200  $\mu$ l), down to pH 8.0. Freshly dissolved  $\alpha$ Syn samples were used for further spectroscopic and functional analyses. Purified  $\alpha$ Syn solutions were divided into aliquots, lyophilized, and stored at -20°C. After thawing in ice-water bath,  $\alpha$ Syn aliquots were immediately used for subsequent functional/binding analyses.

### *Production and characterization of thrombin derivatives*

The plasmid containing the cDNA of prethrombin-2 was a generous gift of Prof. James A. Huntington (University of Cambridge, Cambridge, UK). The recombinant inactive mutant S195A, obtained by single-point mutagenesis, was expressed in *E. coli*, subjected to *in vitro* disulphide oxidative folding, activation by ecarin, and characterized as previously detailed (45,48).  $\beta_T$ -thrombin ( $\beta_T$ T) was obtained by proteolysis of human  $\alpha$ T (7  $\mu$ M) with bovine pancreas trypsin (35 nM) for 3 hours at 37°C in HBS, i.e. 4-(2-hydroxyethyl)-1-piperazineethanesulfonic acid (HEPES) buffered saline, pH 7.4, and characterized as previously detailed (41,46).

### *Platelets aggregation assays*

The effect of  $\alpha$ Syn species on platelets aggregation induced by  $\alpha$ T, TRAP or ADP was

measured at 37°C in whole blood and PRP by MEA, using a multiplate analyzer (Dynabyte, Munich, Germany) (36,41). Citrate-treated venous blood samples were taken from five healthy donors: two males and three females, 28–35 years of age, and non-smokers. The donors gave written informed consent for participation in this study, which was approved by the Institutional Ethics Committee of the Padua University Hospital. PRP was obtained from three healthy subjects as previously described (80,81). Briefly, after centrifugation of citrated venous blood samples (250 g, 10 min, 4°C), the supernatant was diluted 5:1 (v/v) with PBS, pH 7.4, containing 10 mM EDTA, and centrifuged (12.000 g, 1 min, 4°C) to allow sedimentation of platelets. The pellet was washed twice with PBS/EDTA and finally resuspended in HBS, pH 7.4. Platelet count were determined with a Cell-Dyn Emerald 22 cytometer from Abbott Diagnostics (Chicago, IL, USA). Increasing concentrations (0-20  $\mu$ M; 300  $\mu$ l in HBS) of monomeric samples of  $\alpha$ Syn species, i.e. full-length  $\alpha$ Syn, 6xHis- $\alpha$ Syn(1-96) and  $\alpha$ Syn(103-140), were pre-incubated (30 min, 37°C) with whole blood or PRP (300  $\mu$ l, 160.000–200.000 platelets/ $\mu$ l). Platelets aggregation was started by addition of TRAP6 or ADP stock solutions (20  $\mu$ l) and analysed by MEA over 10-min reaction time. ADP-test and TRAP-test solutions for Multiplate assays were purchased from Roche Diagnostics (Basel, Switzerland). When the effect of  $\alpha$ Syn species on  $\alpha$ T-induced aggregation was measured, protease solutions (20  $\mu$ l in HBS) were pre-incubated (30 min, 37°C) with increasing  $\alpha$ Syn concentrations (0-20  $\mu$ M, 300  $\mu$ l in HBS) and then added to blood or PRP samples (300 $\mu$ l). For each MEA measurement, the area under the aggregation curve (AUC) was determined for single donors and the average value expressed as %AUC, relative to the value determined in the absence of  $\alpha$ Syn (AUC<sub>0</sub>) (45,48).

### *Fibrin generation assays*

Fibrin generation was started by adding  $\alpha$ T (1 nM) to a freshly desalted Fb solution (0.44  $\mu$ M) in HBS at 37°C, while the time course of clot formation was followed by continuously recording the solution absorbance at 350 nm (i.e. the turbidity) on a double-beam V-630 Jasco (Tokyo, Japan) spectrophotometer (41,45,48). The effect of  $\alpha$ Syn was estimated by first incubating  $\alpha$ T with increasing concentrations (0-20  $\mu$ M) of  $\alpha$ Syn and then adding a desalted Fb solution.



### Enzymatic activity assays

Hydrolytic activity of  $\alpha$ T was determined at 37°C in HBS on the chromogenic substrate S2238 by measuring the release of pNA at 405nm ( $\epsilon_{405\text{nm}}^{\text{M}} = 9920 \text{ M}^{-1}\cdot\text{cm}^{-1}$ ). The kinetics of FpA and FpB release was followed as earlier reported (41,48). Briefly, human fibrinogen (Fb) ( $\epsilon_{280\text{nm}}^{\text{M}} = 5.1\cdot 10^5 \text{ M}^{-1}\cdot\text{cm}^{-1}$ ) was desalted on an in-house packed (8x125mm) G10 fast-flow column (GE Healthcare, Chicago, IL, USA) eluted with HBS, pH 7.4, at a flow-rate of 0.3 ml/min. Freshly prepared Fb (0.35  $\mu\text{M}$ ) was reacted at 37°C with human  $\alpha$ T (300 pM) in the presence of 15  $\mu\text{M}$   $\alpha$ Syn and at fixed time points proteolysis mixtures were added with formic acid (2% v/v final concentration) to block the proteolysis reaction and induce precipitation of unreacted Fb. After centrifugation (10.000 g, 5 min, 4°C), the supernatant (1.0 ml) was withdrawn, lyophilized, dissolved in 6 M guanidinium hydrochloride solution (170  $\mu\text{l}$ ) and injected (100  $\mu\text{l}$ ) onto a RP-HPLC (4.6 x 250mm) C18 column (Grace-Vydac, Columbia, MD, USA). The column was equilibrated with 40 mM ammonium phosphate buffer, pH 3.1, and eluted with an acetonitrile gradient. The absorbance of the effluent was recorded at 205 nm and the amount of FpA ( $\epsilon_{205\text{nm}}^{\text{M}} = 4.40\cdot 10^4 \text{ M}^{-1}\cdot\text{cm}^{-1}$ ) and FpB ( $\epsilon_{205\text{nm}}^{\text{M}} = 5.12\cdot 10^4 \text{ M}^{-1}\cdot\text{cm}^{-1}$ ) released was determined by integrating the area under the chromatographic peaks. A LC-4000 HPLC system (jasco, Tokyo, Japan) was used for all analyses.

The specificity constants,  $k_{\text{cat}}/K_{\text{m}}$ , for the release of fibrinopeptides were determined by interpolating the data points to equations 1 and 2 (41,48):

$$[\text{FpA}]_t = [\text{FpA}]_{\infty} \cdot (1 - e^{-k't}) \quad (\text{eq. 1})$$

$$[\text{FpB}]_t = [\text{FpB}]_{\infty} \cdot (1 + \alpha \cdot e^{-k't} - \beta \cdot e^{-k''t}) \quad (\text{eq. 2})$$

where  $[\text{FpA}]_t$  or  $[\text{FpB}]_t$  and  $[\text{FpA}]_{\infty}$  or  $[\text{FpB}]_{\infty}$  are the concentration of FpA or FpB at time  $t$  and  $\infty$ , respectively, and  $k'$  and  $k''$  are the observed kinetic constants for FpA or FpB release, obtained as fitting parameters. Under pseudo-first order conditions and low substrate concentration, the specificity constants could be easily determined  $k_{\text{catA}}/K_{\text{mA}} = k'/[\text{E}]$  and  $k_{\text{catB}}/K_{\text{mB}} = k''/[\text{E}]$ , where  $[\text{E}]$  is the protease concentration.

Hydrolysis of the synthetic peptide PAR1(38-60) (1  $\mu\text{M}$ ) by  $\alpha$ T (150 pM) was carried out at 25°C in TBS, in the presence of  $\alpha$ Syn (15  $\mu\text{M}$ ). At time points, aliquots (360  $\mu\text{l}$ ) were taken, acid quenched (10  $\mu\text{l}$ , 4% aqueous TFA) and loaded (350  $\mu\text{L}$ ) onto

a Grace-Vydac (4.6 x 250 mm) C18 column. The column was eluted with a linear acetonitrile-0.078% TFA gradient from 10-45% in 40 min and the release of PAR1(42-60) ( $\epsilon_{205\text{nm}}^{\text{M}} = 95870 \text{ M}^{-1}\cdot\text{cm}^{-1}$ ) was quantified by integrating the area under the chromatographic peak. The kinetic data were interpolated with equation 3, describing a pseudo-first order reaction (41,46,48):

$$[\text{P}]_t = [\text{P}]_{\infty} \cdot [1 - \exp(-k_{\text{obs}}t)] \quad (\text{eq. 3})$$

where  $[\text{P}]_{\infty}$  is the concentration of the fragment PAR1(42-60) when the proteolysis reaction was complete and  $k_{\text{obs}}$  is the observed kinetic constant for PAR1(38-60) hydrolysis, obtained as a fitting parameter. As for the release of fibrinopeptides, under pseudo-first order conditions and low substrate concentration,  $k_{\text{cat}}/K_{\text{m}}$  could be derived as  $k_{\text{obs}}/[\text{E}]$ .

### Spectroscopic methods

*Ultraviolet absorption spectroscopy.* The concentrations of protein/peptide solutions were determined by measuring the absorbance at 280 nm on a Jasco V-630 double-beam spectrophotometer, using the following molar absorptivity values ( $\epsilon_{\text{M}}^{280}$ ): plasma  $\alpha$ T and  $\beta$ T, 67.161  $\text{M}^{-1}\cdot\text{cm}^{-1}$ ; recombinant rS195A, 66.424  $\text{M}^{-1}\cdot\text{cm}^{-1}$ ; ProT, 99.360  $\text{M}^{-1}\cdot\text{cm}^{-1}$ ;  $\alpha$ Syn, 5.960  $\text{M}^{-1}\cdot\text{cm}^{-1}$ ; 6xHis- $\alpha$ Syn(1-96), 1.490  $\text{M}^{-1}\cdot\text{cm}^{-1}$ ;  $\alpha$ Syn(103-140), 4.470  $\text{M}^{-1}\cdot\text{cm}^{-1}$ ; hirugen, 418  $\text{M}^{-1}\cdot\text{cm}^{-1}$ ; Hir(1-47), 3.355  $\text{M}^{-1}\cdot\text{cm}^{-1}$ ; fibrinogen  $\gamma'$ -peptide, 837  $\text{M}^{-1}\cdot\text{cm}^{-1}$ ; [F]-hirugen at 492 nm, 68.000  $\text{M}^{-1}\cdot\text{cm}^{-1}$ ; PABA at 336 nm, 548  $\text{M}^{-1}\cdot\text{cm}^{-1}$ ; S2238 at 316 nm, 12.700  $\text{M}^{-1}\cdot\text{cm}^{-1}$ . The concentration of active  $\alpha$ T was also determined by active-site titration with hirudin (50) and found identical ( $\pm 5\%$ ) to that determined spectrophotometrically.

*Dynamic light scattering.* Measurements were performed at 37°C on a Zetasizer-Nano-S instrument (Malvern Instruments, Worcestershire, UK) at a fixed angle (i.e. 173°) from the incident light (i.e. He-Ne 4 mW laser source at 633 nm). Polystyrene cuvettes (1-cm pathlength, 100  $\mu\text{l}$ ) (Hellma, Switzerland) were used for all measurements. Each measurement consisted of a single run (15 s). Scattering data were analyzed with the Nano-6.20 software and expressed as percentage of volume size distribution, from which the value of  $d_H$  and %PD were extracted (46,82), where  $d_H$  is the diameter of a hard sphere that diffuses at the same speed as the molecule being measured, and %PD is the width of the particle size distribution of a protein in a given sample.

*α-Synuclein inhibits thrombin-induced platelets aggregation*

**Fluorescence spectroscopy.** Binding measurements were carried out at 37°C in HBS, containing 0.1% PEG-8000 (w/v), on a Jasco FP-6500 spectrofluorimeter. Aliquots (2-10 μl) of αSyn or αSyn(103-140) in HBS were added, under gentle magnetic stirring, to an αT solution (70 nM) in the same buffer. At each ligand concentration, samples were incubated for 2 min at 37°C and excited at 295 nm, using an excitation/emission slit of 5/10 nm. Fluorescence intensity was recorded at 334 nm, i.e. the λ<sub>max</sub> of αT emission, after subtracting the corresponding spectra of the ligands alone. Fluorescence data were corrected for sample dilution (<5%). To prevent photobleaching of Trp-residues, a 1-cm pathlength quartz cuvette (2 ml) with two frosted walls, diffusing the incident light inside the sample, was used. The optical density of the solution was always kept <0.05 units both at λ<sub>ex</sub> and λ<sub>em</sub>, to avoid inner filter effect (47). A similar procedure was used for measuring the affinity of all other site-specific ligands tested in this work (i.e. PABA, S2238, Hir(1-47), hirugen, [F]-hirugen and fibrinogen γ'-peptide) for αT in the presence of constant, saturating αSyn or αSyn(103-140) concentration (20 μM). When the binding of PABA was being studied, samples were excited at 336 nm and the emission of PABA was recorded at 375 nm, after baseline subtraction and correction for inner filter effect, as detailed elsewhere (47). For [F]-hirugen binding, aliquots of αT S195A mutant stock solution (30 μM) were incrementally added to a [F]-hirugen solution (60 nM). Samples were excited at 492 nm and the decrease of fluorescence intensity of [F]-hirugen was recorded at 516 nm as a function of αT (46).

The data points were interpolated with equation 4, describing the single-site binding model R + L ↔ RL (47):

$$\Delta F = \Delta F_{\max} \cdot \frac{[L]}{K_d + [L]} \quad (\text{eq. 4})$$

where L is the ligand concentration, ΔF and ΔF<sub>max</sub> are the changes of fluorescence intensity measured at intermediate or saturating ligand concentrations, while the dissociation constant, K<sub>d</sub>, was obtained as a fitting parameter. For Hir(1-47) and [F]-hirugen binding to αT, fluorescence data were interpolated with equation 5, describing the tight-binding model (47).

$$\Delta F = \Delta F_{\max} \cdot \frac{b + \sqrt{b^2 - 4[R][L]}}{2[R]} \quad (\text{eq. 5})$$

$$b = ([R] + [L] + K_d)$$

where [R] and [L] are the total enzyme or ligand concentrations.

**Surface plasmon resonance.** SPR analyses were carried out on a dual flow-cell Biacore X-100 instrument from GE Healthcare. 6xHis-αSyn was noncovalently immobilized onto a Ni<sup>2+</sup>-chelated nitrilotriacetate (NTA) carboxymethyldestrane sensor chip and incremental concentrations of S195A were loaded. The Ni<sup>2+</sup>-NTA/6xHis-αSyn chip assembly was prepared as follows: the NTA chip (GE Healthcare) was first washed (flow-rate: 30 μl/min) with 0.35 M EDTA, pH 8.3 (contact time: 700 sec) and then loaded with 0.5 mM NiCl<sub>2</sub> solution (contact time: 400 sec); excess Ni<sup>2+</sup> was removed by injecting 3 mM EDTA solution (contact time: 350 sec), whereas non-chelating NTA-groups were irreversibly blocked with ethanolamine, after carboxylate activation (contact time: 800 sec) with N-(3-dimethylaminopropyl)-N'-ethylcarbodiimide and N-hydroxysuccinimide; finally, a solution of 6xHis-αSyn (200 nM) was injected on the sensor chip (contact time: 400 sec) to yield a final immobilization level of 2194 response units (RU). The Ni<sup>2+</sup>-NTA/6xHis-αSyn sensor chip was challenged (flow-rate: 30 μl/min; contact time: 350 sec) with increasing concentrations of inactive S195A thrombin mutant, β<sub>T</sub>T, and ProT. All measurements were carried out at 37°C in HBS-EP<sup>+</sup> buffer (10 mM HEPES, pH 7.4, 0.15 M NaCl, 50 μM EDTA, 0.005% v/v polyoxyethylene sorbitan). Between two consecutive runs, the regeneration of Ni<sup>2+</sup>-NTA/6xHis-αSyn chip was achieved with HBS-EP<sup>+</sup> buffer, containing 2 M NaCl. Each sensogram was subtracted for the corresponding baseline, obtained on the reference flow cell and accounting for nonspecific binding, i.e. typically less than 2% of RU<sub>max</sub>. The binding data were analyzed using the BIAevaluation software. The dissociation constant (K<sub>d</sub>) relative to the binding of αT to immobilized αSyn was obtained as a fitting parameter by plotting the RU value at the steady state (RU<sub>eq</sub>) versus [αT] and interpolating the data points with equation 6, describing 1:1 binding model:

$$RU_{\text{eq}} = RU_{\max} \cdot \frac{[L]}{K_d + [L]} \quad (\text{eq. 6})$$

where L is the concentration of αT, while RU<sub>eq</sub> and RU<sub>max</sub> are the RU values measured (at the steady state) with intermediate or saturating [L] (41,48).

*Isothermal titration calorimetry (ITC)*

## *$\alpha$ -Synuclein inhibits thrombin-induced platelets aggregation*

ITC titrations were performed at  $25 \pm 0.1^\circ\text{C}$  in 20 mM HEPES pH 7.4, 0.15M, using a MicroCal VP-ITC instrument, as described (83). To a S195A thrombin mutant solution (1.7 ml, 2  $\mu\text{M}$ ) were sequentially added 25 aliquots (10  $\mu\text{l}$  each) of  $\alpha\text{Syn}$  stock solution (40  $\mu\text{M}$ ), under continuous stirring (307 r.p.m.) and a delay of 4 min after each injection. Before analysis, protein samples were dialyzed overnight in the same buffer, using a Slide-A-Lyzer (3.5-kDa cutoff) from ThermoFischer Scientific (Waltham, MA, USA), and thoroughly degassed. The heat of dilution was determined in control experiments by injecting aliquots (10  $\mu\text{l}$ ) of  $\alpha\text{Syn}$  stock solution (40  $\mu\text{M}$ ) into buffer and this was subtracted from the integrated binding isotherm prior to curve fitting. The thermograms were analysed using the MicroCal ITC Data Analysis software.

### *Fluorescence microscopy techniques*

PRP was prepared as described above (80,81). Afterwards, isolated platelets in serum-free Iscove's Modified Dulbecco's medium were seeded ( $20 \times 10^6$  platelets/well) in 24-well culture plates containing a glass coverslip coated with gelatine. After 24 h, resting platelets were incubated with increasing concentrations of  $\alpha\text{Syn-GFP}$  (0-2  $\mu\text{g}$ ) in HBS. In the same experiment, resting platelets were first activated with 10  $\mu\text{M}$  TRAP6 and then added with  $\alpha\text{Syn-GFP}$ . Untreated resting platelets and TRAP6 stimulated platelets, without  $\alpha\text{Syn-GFP}$ , were used as controls. Resting and stimulated platelets were observed for 30 min at  $37^\circ\text{C}$ , under 5%  $\text{CO}_2$  flow, in the time-lapse mode using a DMI6000-CS fluorescence microscope (Leica Microsystem, Wetzlar, Germany), equipped with a DFC365FX camera and a 40x/0.60 dry objective magnification. Images were taken in real time (at 30 min) using a differential interference contrast (DIC) and fluorescence objectives and processed using the Leica Application Suite 3.1.1. software (Leica Microsystem).

In another experiment, both resting and activated platelets were incubated for 24 h with  $\alpha\text{Syn-GFP}$  (0.7 and 1.4  $\mu\text{M}$ ), washed twice with PBS and fixed for 20 min in 2% paraformaldehyde. The slides were mounted with Mowiol antifade solution (Sigma-Aldrich, St. Louis, MO, USA) and directly observed with a DMI6000-CS microscope. Images were acquired using 100x/1.4 oil immersion objective magnification. Finally, endogenous  $\alpha\text{Syn}$  exposure on platelets plasma membrane was detected by immunofluorescence microscopy, using the same equipment as above. Resting and TRAP6

activated platelets were incubated for 1 h at  $37^\circ\text{C}$  with 5  $\mu\text{g/ml}$  mouse anti-human  $\alpha\text{Syn}$  monoclonal antibody [ $\alpha$ -synuclein(211):sc-12767] from Santa Cruz Biotechnology (Dallas, TX, USA), followed by addition of a diluted (1:200) Alexa Fluor 594-conjugated goat anti-mouse IgG (Thermo-Fisher, Waltham, MA, USA). Both primary and secondary antibodies were diluted in PBS, containing 0.5% bovine serum albumin. Unspecific binding was assessed by incubating platelets with the secondary antibody alone, in the absence of the primary antibody.

### *Computational methods*

PAR4 (UniProt code: Q96RI0; amino acid residues Asp65-Phe347) structure was modeled by homology on the template structure of PAR1 (PDB code: 3vw7; UniProt code: P25116; amino acid residues Asp91-Cys378) (54) with which it shares 34.6% sequence identity and 56.1% sequence similarity. The Swiss-Model software was used (84). Electrostatic potential calculations were performed using APBS software (53). For  $\alpha\text{T}$ , calculations were run on the non-glycosylated X-ray structure of  $\alpha\text{T}$  (1ppb), after removal of the coordinates of the inhibitor D-Phe-Pip-Arg-chloromethylketone, water and HEPES molecules (49). The coordinates of human PAR1 (3vw7) (54) and P2Y<sub>12</sub> receptor (4ntj) (55) bound to the inhibitors Vorapaxar and AZD1283, respectively, were considered. The electrostatic contribution of Na<sup>+</sup>-ion bound to PAR1 was not considered in our calculations. A solvent dielectric of 78.14 and a protein dielectric of 2.0 at 310K in 150 mM NaCl were used. Final electrostatic maps were constructed by subtracting the protein self-energies from the calculated map using the DXMATH utility in APBS. Notably, to facilitate crystallogenes, T4 lysozyme (T4L) and the BRIL domain were inserted into the intracellular loop 3 of PAR1 (54) and P2Y<sub>12</sub>R (55), respectively. In the recombinant PAR1-T4L fusion protein the N-terminal exodomain was missing. The coordinates of the bound inhibitor were virtually removed, along with the inserted structure of T4L and BRIL. To minimize artefactual charge perturbations, following virtual domain excision, the remaining N- and C-termini were made neutral by acetylation or amidation.



## Data availability

All other data that support the findings of this study are available from the corresponding author upon reasonable request.

---

*Author contributions* - G.P., L.A., I.A., A.P. and F.U. performed research; C.M.R. and P.S. performed fluorescence microscopy work; D.P. performed modelling work and electrostatic calculations; A.N. produced recombinant  $\alpha$ Syn species; V.D.F. inspired and coordinated the work, analyzed and interpreted the data, and wrote the manuscript; all authors analyzed and interpreted the data and reviewed the final content of the manuscript.

*Funding* - This work was supported by a Grant from the CaRiPaRo Foundation Excellence Research Project - BPiTA n. 52012 and MIUR PRIN-2007 Grant to V.D.F. The post-doctoral fellowship of D.P. and I.A. was funded by the BPiTA project.

*Conflict of interest* - The authors declare that they have no conflicts of interest with the contents of this article.

*Acknowledgements* - Part of this work was presented at the ISTH-2017 conference, July 8-13, 2017 - Berlin (Germany). Commun. PB-1706. The authors are grateful to Dr. Daniele Dalzoppo (University of Padua) for critically reading the manuscript and Dr. Nicola Pozzi for performing some very preliminary measurements. The authors also thank Dr. Vittorio Pengo (University of Padua) for providing accessibility to the Multiplate analyser at the beginning of this study and for supplying us with some blood samples from normal subjects. The generous gift of the plasmid containing the cDNA of prethrombin-2 by Prof. James A. Huntington (University of Cambridge, Cambridge, UK) is gratefully acknowledged.

*Abbreviations* -  $\alpha$ Syn, recombinant human  $\alpha$ -synuclein;  $\alpha$ Syn(1-96), recombinant polypeptide corresponding to  $\alpha$ Syn sequence 1-96;  $\alpha$ Syn(103-140), synthetic peptide corresponding to  $\alpha$ Syn sequence 103-140;  $\alpha$ Syn-GFP,  $\alpha$ Syn fused at the C-terminal end with GFP;  $\alpha$ T, human  $\alpha$ -thrombin; ADP, adenosine 5'-diphosphate; AUC, area under the aggregation curve; DLS, dynamic light scattering; EDTA, ethylenediaminetetraacetate; Fb, human fibrinogen; GFP, green fluorescent protein; HBS, 20 mM HEPES pH 7.4, 0.15 M NaCl, 0.1 % PEG-8000 (w/v); HBS-EP<sup>+</sup>, 10 mM HEPES, pH 7.4, 0.15 M NaCl, 50  $\mu$ M EDTA, 0.005% (v/v) polyoxyethylene sorbitan; HEPES, 4-(2-hydroxyethyl)-1-piperazineethanesulfonic acid; IMAC, immobilized metal ion affinity chromatography; ITC, isothermal titration calorimetry; MEA, Multiple Electrode Aggregometry; NTA, nitrilotriacetate; PABA, *p*-aminobenzamidine; PAR1, protease-activated receptor-1; PBS, phosphate buffered saline; *p*NA, *p*-nitroaniline; PD, Parkinson's disease; ProT, human prothrombin; PRP, platelet rich plasma; S2238, (D)-Phe-Pip-Arg-*p*-nitroanilide; SPR, surface plasmon resonance; TBS, 5 mM Tris-HCl pH 7.4, 0.15 M NaCl; TFA, trifluoroacetic acid; TRAP6, thrombin receptor activating peptide, having the sequence SFLLRN-NH<sub>2</sub>; Tris-HCl, Tris(hydroxymethyl)aminomethane hydrochloride; vWF, von Willebrand factor.

## References

1. George, J. M. (2002) The synucleins. *Genome Biol* **3**, Reviews3002
2. Goedert, M. (2001) Alpha-synuclein and neurodegenerative diseases. *Nat Rev Neurosci* **2**, 492-501
3. Uversky, V. N., Li, J., Souillac, P., Millett, I. S., Doniach, S., Jakes, R., Goedert, M., and Fink, A. L. (2002) Biophysical properties of the synucleins and their propensities to fibrillate: inhibition of alpha-synuclein assembly by beta- and gamma-synucleins. *J Biol Chem* **277**, 11970-11978
4. Theillet, F. X., Binolfi, A., Bekei, B., Martorana, A., Rose, H. M., Stuiver, M., Verzini, S., Lorenz, D., van Rossum, M., Goldfarb, D., and Selenko, P. (2016) Structural disorder of monomeric  $\alpha$ -synuclein persists in mammalian cells. *Nature* **530**, 45-50

5. Bartels, T., Ahlstrom, L. S., Leftin, A., Kamp, F., Haass, C., Brown, M. F., and Beyer, K. (2010) The N-terminus of the intrinsically disordered protein  $\alpha$ -synuclein triggers membrane binding and helix folding. *Biophys J* **99**, 2116-2124
6. Qin, Z., Hu, D., Han, S., Hong, D. P., and Fink, A. L. (2007) Role of different regions of alpha-synuclein in the assembly of fibrils. *Biochemistry* **46**, 13322-13330
7. Eliezer, D., Kutluay, E., Bussell, R., Jr., and Browne, G. (2001) Conformational properties of alpha-synuclein in its free and lipid-associated states. *J Mol Biol* **307**, 1061-1073
8. Wood, S. J., Wypych, J., Steavenson, S., Louis, J. C., Citron, M., and Biere, A. L. (1999) alpha-synuclein fibrillogenesis is nucleation-dependent. Implications for the pathogenesis of Parkinson's disease. *J Biol Chem* **274**, 19509-19512
9. Li, B., Ge, P., Murray, K. A., Sheth, P., Zhang, M., Nair, G., Sawaya, M. R., Shin, W. S., Boyer, D. R., Ye, S., Eisenberg, D. S., Zhou, Z. H., and Jiang, L. (2018) Cryo-EM of full-length  $\alpha$ -synuclein reveals fibril polymorphs with a common structural kernel. *Nat Commun* **9**, 3609
10. van Raaij, M. E., van Gestel, J., Segers-Nolten, I. M., de Leeuw, S. W., and Subramaniam, V. (2008) Concentration dependence of alpha-synuclein fibril length assessed by quantitative atomic force microscopy and statistical-mechanical theory. *Biophys J* **95**, 4871-4878
11. Uversky, V. N., E, M. C., Bower, K. S., Li, J., and Fink, A. L. (2002) Accelerated alpha-synuclein fibrillation in crowded milieu. *FEBS Lett* **515**, 99-103
12. Recchia, A., Debetto, P., Negro, A., Guidolin, D., Skaper, S. D., and Giusti, P. (2004) Alpha-synuclein and Parkinson's disease. *Faseb j* **18**, 617-626
13. Lashuel, H. A., Overk, C. R., Oueslati, A., and Masliah, E. (2013) The many faces of alpha-synuclein: from structure and toxicity to therapeutic target. in *Nat Rev Neurosci*, England. pp 38-48
14. Chiti, F., and Dobson, C. M. (2017) Protein Misfolding, Amyloid Formation, and Human Disease: A Summary of Progress Over the Last Decade. *Annu Rev Biochem* **86**, 27-68
15. Fusco, G., Chen, S. W., Williamson, P. T. F., Cascella, R., Perni, M., Jarvis, J. A., Cecchi, C., Vendruscolo, M., Chiti, F., Cremades, N., Ying, L., Dobson, C. M., and De Simone, A. (2017) Structural basis of membrane disruption and cellular toxicity by  $\alpha$ -synuclein oligomers. *Science* **358**, 1440-1443
16. Bendor, J. T., Logan, T. P., and Edwards, R. H. (2013) The function of  $\alpha$ -synuclein. *Neuron* **79**, 1044-1066
17. Lautenschläger, J., Kaminski, C. F., and Kaminski Schierle, G. S. (2017)  $\alpha$ -Synuclein - Regulator of Exocytosis, Endocytosis, or Both? *Trends Cell Biol* **27**, 468-479
18. Borghi, R., Marchese, R., Negro, A., Marinelli, L., Forloni, G., Zaccheo, D., Abbruzzese, G., and Tabaton, M. (2000) Full length alpha-synuclein is present in cerebrospinal fluid from Parkinson's disease and normal subjects. *Neurosci Lett* **287**, 65-67
19. El-Agnaf, O. M., Salem, S. A., Paleologou, K. E., Cooper, L. J., Fullwood, N. J., Gibson, M. J., Curran, M. D., Court, J. A., Mann, D. M., Ikeda, S., Cookson, M. R., Hardy, J., and Allsop, D. (2003) Alpha-synuclein implicated in Parkinson's disease is present in extracellular biological fluids, including human plasma. *Faseb j* **17**, 1945-1947
20. Hashimoto, M., Yoshimoto, M., Sisk, A., Hsu, L. J., Sundsmo, M., Kittel, A., Saitoh, T., Miller, A., and Masliah, E. (1997) NACP, a synaptic protein involved in Alzheimer's disease, is differentially regulated during megakaryocyte differentiation. *Biochem Biophys Res Commun* **237**, 611-616
21. Shin, E. C., Cho, S. E., Lee, D. K., Hur, M. W., Paik, S. R., Park, J. H., and Kim, J. (2000) Expression patterns of alpha-synuclein in human hematopoietic cells and in *Drosophila* at different developmental stages. *Mol Cells* **10**, 65-70

22. Ueda, K., Fukushima, H., Masliah, E., Xia, Y., Iwai, A., Yoshimoto, M., Otero, D. A., Kondo, J., Ihara, Y., and Saitoh, T. (1993) Molecular cloning of cDNA encoding an unrecognized component of amyloid in Alzheimer disease. *Proc Natl Acad Sci U S A* **90**, 11282-11286
23. Barbour, R., Kling, K., Anderson, J. P., Banducci, K., Cole, T., Diep, L., Fox, M., Goldstein, J. M., Soriano, F., Seubert, P., and Chilcote, T. J. (2008) Red blood cells are the major source of alpha-synuclein in blood. *Neurodegener Dis* **5**, 55-59
24. Nakai, M., Fujita, M., Waragai, M., Sugama, S., Wei, J., Akatsu, H., Ohtaka-Maruyama, C., Okado, H., and Hashimoto, M. (2007) Expression of alpha-synuclein, a presynaptic protein implicated in Parkinson's disease, in erythropoietic lineage. *Biochem Biophys Res Commun* **358**, 104-110
25. Pei, Y., and Maitta, R. W. (2019) Alpha synuclein in hematopoiesis and immunity. *Heliyon* **5**, e02590
26. Burkhardt, J. M., Vaudel, M., Gambaryan, S., Radau, S., Walter, U., Martens, L., Geiger, J., Sickmann, A., and Zahedi, R. P. (2012) The first comprehensive and quantitative analysis of human platelet protein composition allows the comparative analysis of structural and functional pathways. *Blood* **120**, e73-82
27. Park, S. M., Jung, H. Y., Kim, H. O., Rhim, H., Paik, S. R., Chung, K. C., Park, J. H., and Kim, J. (2002) Evidence that alpha-synuclein functions as a negative regulator of Ca(++)-dependent alpha-granule release from human platelets. *Blood* **100**, 2506-2514
28. Versteeg, H. H., Heemskerk, J. W., Levi, M., and Reitsma, P. H. (2013) New fundamentals in hemostasis. *Physiol Rev* **93**, 327-358
29. Kahn, M. L., Zheng, Y. W., Huang, W., Bigornia, V., Zeng, D., Moff, S., Farese, R. V., Jr., Tam, C., and Coughlin, S. R. (1998) A dual thrombin receptor system for platelet activation. *Nature* **394**, 690-694
30. Nylander, S., Mattsson, C., Ramström, S., and Lindahl, T. L. (2004) Synergistic action between inhibition of P2Y12/P2Y1 and P2Y12/thrombin in ADP- and thrombin-induced human platelet activation. *Br J Pharmacol* **142**, 1325-1331
31. Negro, A., Brunati, A. M., Donella-Deana, A., Massimino, M. L., and Pinna, L. A. (2002) Multiple phosphorylation of alpha-synuclein by protein tyrosine kinase Syk prevents eosin-induced aggregation. *Faseb j* **16**, 210-212
32. Albani, D., Peverelli, E., Rametta, R., Batelli, S., Veschini, L., Negro, A., and Forloni, G. (2004) Protective effect of TAT-delivered alpha-synuclein: relevance of the C-terminal domain and involvement of HSP70. *Faseb j* **18**, 1713-1715
33. Uversky, V. N., Li, J., and Fink, A. L. (2001) Evidence for a partially folded intermediate in alpha-synuclein fibril formation. *J Biol Chem* **276**, 10737-10744
34. Scarborough, R. M., Naughton, M. A., Teng, W., Hung, D. T., Rose, J., Vu, T. K., Wheaton, V. I., Turck, C. W., and Coughlin, S. R. (1992) Tethered ligand agonist peptides. Structural requirements for thrombin receptor activation reveal mechanism of proteolytic unmasking of agonist function. *J Biol Chem* **267**, 13146-13149
35. Cardinal, D. C., and Flower, R. J. (1980) The electronic aggregometer: a novel device for assessing platelet behavior in blood. *J Pharmacol Methods* **3**, 135-158
36. Tóth, O., Calatzis, A., Penz, S., Losonczy, H., and Siess, W. (2006) Multiple electrode aggregometry: a new device to measure platelet aggregation in whole blood. *Thromb Haemost* **96**, 781-788
37. Phan, H. T. M., Bartz, J. C., Ayers, J., Giasson, B. I., Schubert, M., Rodenhausen, K. B., Kananizadeh, N., Li, Y., and Bartelt-Hunt, S. L. (2018) Adsorption and decontamination of α-synuclein from medically and environmentally-relevant surfaces. *Colloids Surf B Biointerfaces* **166**, 98-107
38. Weisel, J. W., and Nagaswami, C. (1992) Computer modeling of fibrin polymerization kinetics correlated with electron microscope and turbidity observations: clot structure and assembly are kinetically controlled. *Biophys J* **63**, 111-128



39. Kononova, O., Litvinov, R. I., Zhmurov, A., Alekseenko, A., Cheng, C. H., Agarwal, S., Marx, K. A., Weisel, J. W., and Barsegov, V. (2013) Molecular mechanisms, thermodynamics, and dissociation kinetics of knob-hole interactions in fibrin. *J Biol Chem* **288**, 22681-22692
40. Nguyen, H. H., Park, J., Kang, S., and Kim, M. (2015) Surface plasmon resonance: a versatile technique for biosensor applications. *Sensors (Basel)* **15**, 10481-10510
41. Acquasaliente, L., Peterle, D., Tescari, S., Pozzi, N., Pengo, V., and De Filippis, V. (2016) Molecular mapping of alpha-thrombin (alphaT)/beta2-glycoprotein I (beta2GpI) interaction reveals how beta2GpI affects alphaT functions. *Biochem J* **473**, 4629-4650
42. Huntington, J. A. (2005) Molecular recognition mechanisms of thrombin. *J Thromb Haemost* **3**, 1861-1872
43. Bock, P. E., Panizzi, P., and Verhamme, I. M. (2007) Exosites in the substrate specificity of blood coagulation reactions. *J Thromb Haemost* **5 Suppl 1**, 81-94
44. Di Cera, E. (2008) Thrombin. *Mol Aspects Med* **29**, 203-254
45. Pozzi, N., Acquasaliente, L., Frasson, R., Cristiani, A., Moro, S., Banzato, A., Pengo, V., Scaglione, G. L., Arcovito, A., De Cristofaro, R., and De Filippis, V. (2013)  $\beta$ 2 -Glycoprotein I binds to thrombin and selectively inhibits the enzyme procoagulant functions. *J Thromb Haemost* **11**, 1093-1102
46. Sokolov, A. V., Acquasaliente, L., Kostevich, V. A., Frasson, R., Zakharova, E. T., Pontarollo, G., Vasilyev, V. B., and De Filippis, V. (2015) Thrombin inhibits the anti-myeloperoxidase and ferroxidase functions of ceruloplasmin: relevance in rheumatoid arthritis. *Free Radic Biol Med* **86**, 279-294
47. Pozzi, N., Zerbetto, M., Acquasaliente, L., Tescari, S., Frezzato, D., Polimeno, A., Gohara, D. W., Di Cera, E., and De Filippis, V. (2016) Loop Electrostatics Asymmetry Modulates the Preexisting Conformational Equilibrium in Thrombin. *Biochemistry* **55**, 3984-3994
48. Pontarollo, G., Acquasaliente, L., Peterle, D., Frasson, R., Artusi, I., and De Filippis, V. (2017) Non-canonical proteolytic activation of human prothrombin by subtilisin from *Bacillus subtilis* may shift the procoagulant-anticoagulant equilibrium toward thrombosis. *J Biol Chem* **292**, 15161-15179
49. Bode, W., Turk, D., and Karshikov, A. (1992) The refined 1.9-Å X-ray crystal structure of D-Phe-Pro-Arg chloromethylketone-inhibited human alpha-thrombin: structure analysis, overall structure, electrostatic properties, detailed active-site geometry, and structure-function relationships. *Protein Sci* **1**, 426-471
50. De Filippis, V., Colombo, G., Russo, I., Spadari, B., and Fontana, A. (2002) Probing the hirudin-thrombin interaction by incorporation of noncoded amino acids and molecular dynamics simulation. *Biochemistry* **41**, 13556-13569
51. Pineda, A. O., Chen, Z. W., Marino, F., Mathews, F. S., Mosesson, M. W., and Di Cera, E. (2007) Crystal structure of thrombin in complex with fibrinogen gamma' peptide. in *Biophys Chem*, Netherlands. pp 556-559
52. De Cristofaro, R., and De Filippis, V. (2003) Interaction of the 268-282 region of glycoprotein I with the heparin-binding site of thrombin inhibits the enzyme activation of factor VIII. *Biochem J* **373**, 593-601
53. Baker, N. A., Sept, D., Joseph, S., Holst, M. J., and McCammon, J. A. (2001) Electrostatics of nanosystems: application to microtubules and the ribosome. *Proc Natl Acad Sci U S A* **98**, 10037-10041
54. Zhang, C., Srinivasan, Y., Arlow, D. H., Fung, J. J., Palmer, D., Zheng, Y., Green, H. F., Pandey, A., Dror, R. O., Shaw, D. E., Weis, W. I., Coughlin, S. R., and Kobilka, B. K. (2012) High-resolution crystal structure of human protease-activated receptor 1. *Nature* **492**, 387-392
55. Zhang, K., Zhang, J., Gao, Z. G., Zhang, D., Zhu, L., Han, G. W., Moss, S. M., Paoletta, S., Kiselev, E., Lu, W., Fenalti, G., Zhang, W., Müller, C. E., Yang, H., Jiang, H., Cherezov, V., Katritch, V., Jacobson, K. A., Stevens, R. C., Wu, B., and Zhao, Q. (2014) Structure of the human P2Y<sub>12</sub> receptor in complex with an antithrombotic drug. *Nature* **509**, 115-118

56. Faruqi, T. R., Weiss, E. J., Shapiro, M. J., Huang, W., and Coughlin, S. R. (2000) Structure-function analysis of protease-activated receptor 4 tethered ligand peptides. Determinants of specificity and utility in assays of receptor function. *J Biol Chem* **275**, 19728-19734
57. De Filippis, V., Lancellotti, S., Maset, F., Spolaore, B., Pozzi, N., Gambaro, G., Oggianu, L., Calò, L. A., and De Cristofaro, R. (2012) Oxidation of Met1606 in von Willebrand factor is a risk factor for thrombotic and septic complications in chronic renal failure. *Biochem J* **442**, 423-432
58. Pozzi, N., Acquasaliente, L., Frasson, R., Cristiani, A., Moro, S., Banzato, A., Pengo, V., Scaglione, G. L., Arcovito, A., De Cristofaro, R., and De Filippis, V. (2013) beta2 -Glycoprotein I binds to thrombin and selectively inhibits the enzyme procoagulant functions. *J Thromb Haemost* **11**, 1093-1102
59. Peterle, D., Pontarollo, G., Spada, S., Brun, P., Palazzi, L., Sokolov, A. V., Spolaore, B., Polverino de Laureto, P., Vasilyev, V. B., Castagliuolo, I., and De Filippis, V. (2020) A serine protease secreted from *Bacillus subtilis* cleaves human plasma transthyretin to generate an amyloidogenic fragment. *Commun Biol* **3**, 764
60. Gandhi, P. S., Chen, Z., Appelbaum, E., Zapata, F., and Di Cera, E. (2011) Structural basis of thrombin-protease-activated receptor interactions. *IUBMB Life* **63**, 375-382
61. Cruft, J., H., Mauritzen, C. M., and Stedman, E. (1957) The nature and physicochemical properties of histones. in *Philosophical Transactions of the Royal Society of London. Series B, Biological Sciences* **241**, 93-145.
62. Törnudd, M., Ramström, S., Kvitting, J. E., Alfredsson, J., Pihl, R., and Berg, S. (2021) Protamine stimulates platelet aggregation in vitro with activation of the fibrinogen receptor and alpha-granule release, but impairs secondary activation via ADP and thrombin receptors. *Platelets* **32**, 90-96
63. Canobbio, I., Visconte, C., Momi, S., Guidetti, G. F., Zarà, M., Canino, J., Falcinelli, E., Gresele, P., and Torti, M. (2017) Platelet amyloid precursor protein is a modulator of venous thromboembolism in mice. *Blood* **130**, 527-536
64. Hilt, Z. T., Pariser, D. N., Ture, S. K., Mohan, A., Quijada, P., Asante, A. A., Cameron, S. J., Sterling, J. A., Merkel, A. R., Johanson, A. L., Jenkins, J. L., Small, E. M., McGrath, K. E., Palis, J., Elliott, M. R., and Morrell, C. N. (2019) Platelet-derived β2M regulates monocyte inflammatory responses. *JCI Insight* **4**
65. Kim, K. S., Park, J. Y., Jou, I., and Park, S. M. (2010) Regulation of Weibel-Palade body exocytosis by alpha-synuclein in endothelial cells. *J Biol Chem* **285**, 21416-21425
66. Srivastava, K., Lee, M., and Morrell, C. (2007) Mechanism of alpha-synuclein inhibition of platelet granule exocytosis. *Circulation* **116**, II\_76
67. Daniele, S., Pietrobono, D., Fusi, J., Lo Gerfo, A., Cerri, E., Chico, L., Iofrida, C., Petrozzi, L., Baldacci, F., Giacomelli, C., Galetta, F., Siciliano, G., Bonuccelli, U., Trincavelli, M. L., Franzoni, F., and Martini, C. (2018) α-Synuclein Aggregated with Tau and β-Amyloid in Human Platelets from Healthy Subjects: Correlation with Physical Exercise. *Front Aging Neurosci* **10**, 17
68. Engbers, M. J., van Hylckama Vlieg, A., and Rosendaal, F. R. (2010) Venous thrombosis in the elderly: incidence, risk factors and risk groups. *J Thromb Haemost* **8**, 2105-2112
69. Chang, C. W., Yang, S. Y., Yang, C. C., and Wu, Y. R. (2019) Plasma and Serum Alpha-Synuclein as a Biomarker of Diagnosis in Patients With Parkinson's Disease. *Front Neurol* **10**, 1388
70. Struck, L. K., Rodnitzky, R. L., and Dobson, J. K. (1990) Stroke and its modification in Parkinson's disease. *Stroke* **21**, 1395-1399
71. Levine, R. L., Jones, J. C., and Bee, N. (1992) Stroke and Parkinson's disease. *Stroke* **23**, 839-842
72. Korten, A., Lodder, J., Vreeling, F., Boreas, A., van Raak, L., and Kessels, F. (2001) Stroke and idiopathic Parkinson's disease: does a shortage of dopamine offer protection against stroke? *Mov Disord* **16**, 119-123

73. Sharma, P., Nag, D., Atam, V., Seth, P. K., and Khanna, V. K. (1991) Platelet aggregation in patients with Parkinson's disease. *Stroke* **22**, 1607-1608
74. Becker, C., Jick, S. S., and Meier, C. R. (2010) Risk of stroke in patients with idiopathic Parkinson disease. *Parkinsonism Relat Disord* **16**, 31-35
75. Huang, Y. P., Chen, L. S., Yen, M. F., Fann, C. Y., Chiu, Y. H., Chen, H. H., and Pan, S. L. (2013) Parkinson's disease is related to an increased risk of ischemic stroke—a population-based propensity score-matched follow-up study. *PLoS One* **8**, e68314
76. Rogers, J. D., Sanchez-Saffon, A., Frol, A. B., and Diaz-Arrastia, R. (2003) Elevated plasma homocysteine levels in patients treated with levodopa: association with vascular disease. *Arch Neurol* **60**, 59-64
77. Scigliano, G., Musicco, M., Soliveri, P., Piccolo, I., Ronchetti, G., and Girotti, F. (2006) Reduced risk factors for vascular disorders in Parkinson disease patients: a case-control study. *Stroke* **37**, 1184-1188
78. Li, W., Johnson, D. J., Adams, T. E., Pozzi, N., De Filippis, V., and Huntington, J. A. (2010) Thrombin inhibition by serpins disrupts exosite II. *J Biol Chem* **285**, 38621-38629
79. De Filippis, V., Quarzago, D., Vindigni, A., Di Cera, E., and Fontana, A. (1998) Synthesis and characterization of more potent analogues of hirudin fragment 1-47 containing non-natural amino acids. *Biochemistry* **37**, 13507-13515
80. Radu, C. M., Spiezia, L., Bulato, C., Gavasso, S., Campello, E., Sartorello, F., Castoldi, E., and Simioni, P. (2016) Endocytosis of exogenous factor V by ex-vivo differentiated megakaryocytes from patients with severe parahaemophilia. *Br J Haematol* **175**, 517-524
81. De Toni, L., Radu, C. M., Sabovic, I., Di Nisio, A., Dall'Acqua, S., Guidolin, D., Spampinato, S., Campello, E., Simioni, P., and Foresta, C. (2020) Increased Cardiovascular Risk Associated with Chemical Sensitivity to Perfluoro-Octanoic Acid: Role of Impaired Platelet Aggregation. *Int J Mol Sci* **21**
82. Donnini, S., Finetti, F., Francese, S., Boscaro, F., Dani, F. R., Maset, F., Frasson, R., Palmieri, M., Pazzagli, M., De Filippis, V., Garaci, E., and Ziche, M. (2011) A novel protein from the serum of *Python sebae*, structurally homologous with type- $\gamma$  phospholipase A(2) inhibitor, displays antitumour activity. *Biochem J* **440**, 251-262
83. Ricatti, J., Acquasaliente, L., Ribaud, G., De Filippis, V., Bellini, M., Llovera, R. E., Barollo, S., Pezzani, R., Zagotto, G., Persaud, K. C., and Mucignat-Caretta, C. (2019) Effects of point mutations in the binding pocket of the mouse major urinary protein MUP20 on ligand affinity and specificity. *Sci Rep* **9**, 300
84. Waterhouse, A., Bertoni, M., Bienert, S., Studer, G., Tauriello, G., Gumienny, R., Heer, F. T., de Beer, T. A. P., Rempfer, C., Bordoli, L., Lepore, R., and Schwede, T. (2018) SWISS-MODEL: homology modelling of protein structures and complexes. *Nucleic Acids Res* **46**, W296-w303



*α-Synuclein inhibits thrombin-induced platelets aggregation*

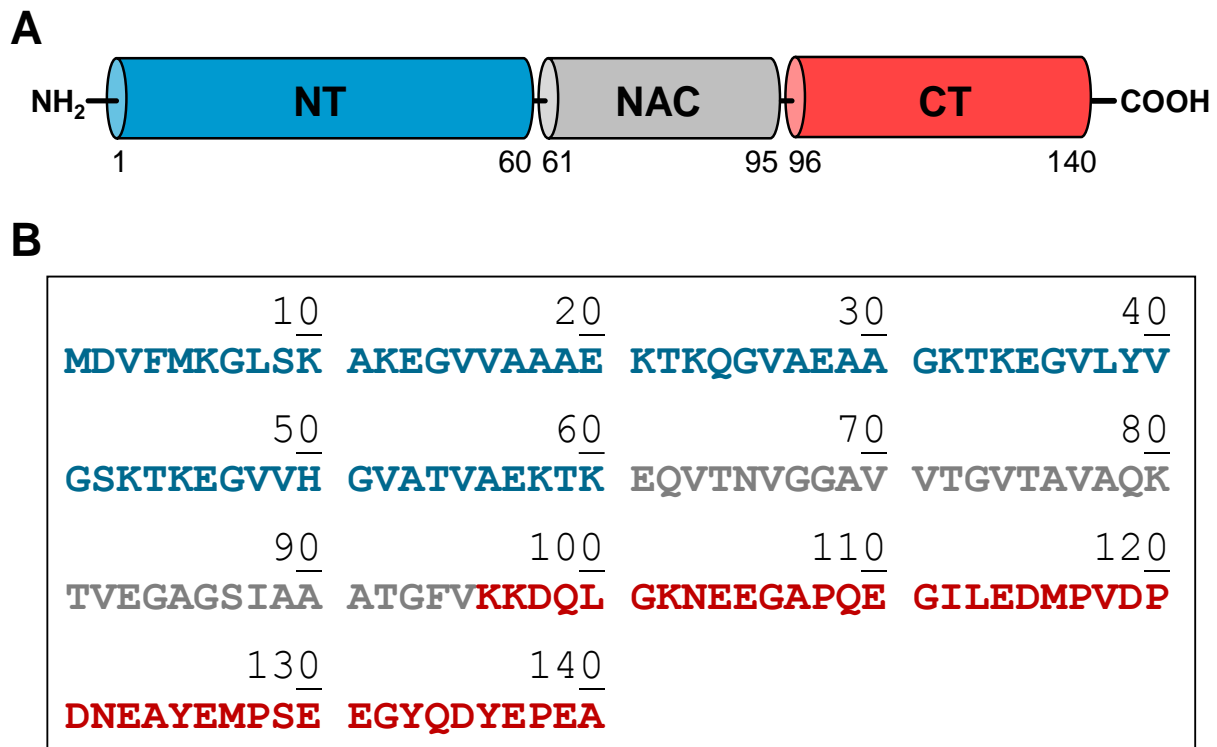

**Figure 1. Domain architecture (A) and amino acid sequence (B) of human  $\alpha$ Syn.** NT: the N-Terminal domain region (amino acids 1-60) is positively charged (pI: 9.4) and assumes a helical conformation on lipid membrane surfaces. NAC: the Non-Amyloid  $\beta$ -Component (amino acids 61-95) is highly hydrophobic, has strong  $\beta$ -sheet conformational propensity, and mediates  $\alpha$ Syn aggregation/fibrillation. CT: the C-Terminal Domain (amino acids 96-140), is strongly negative (pI: 3.1).

*α-Synuclein inhibits thrombin-induced platelets aggregation*

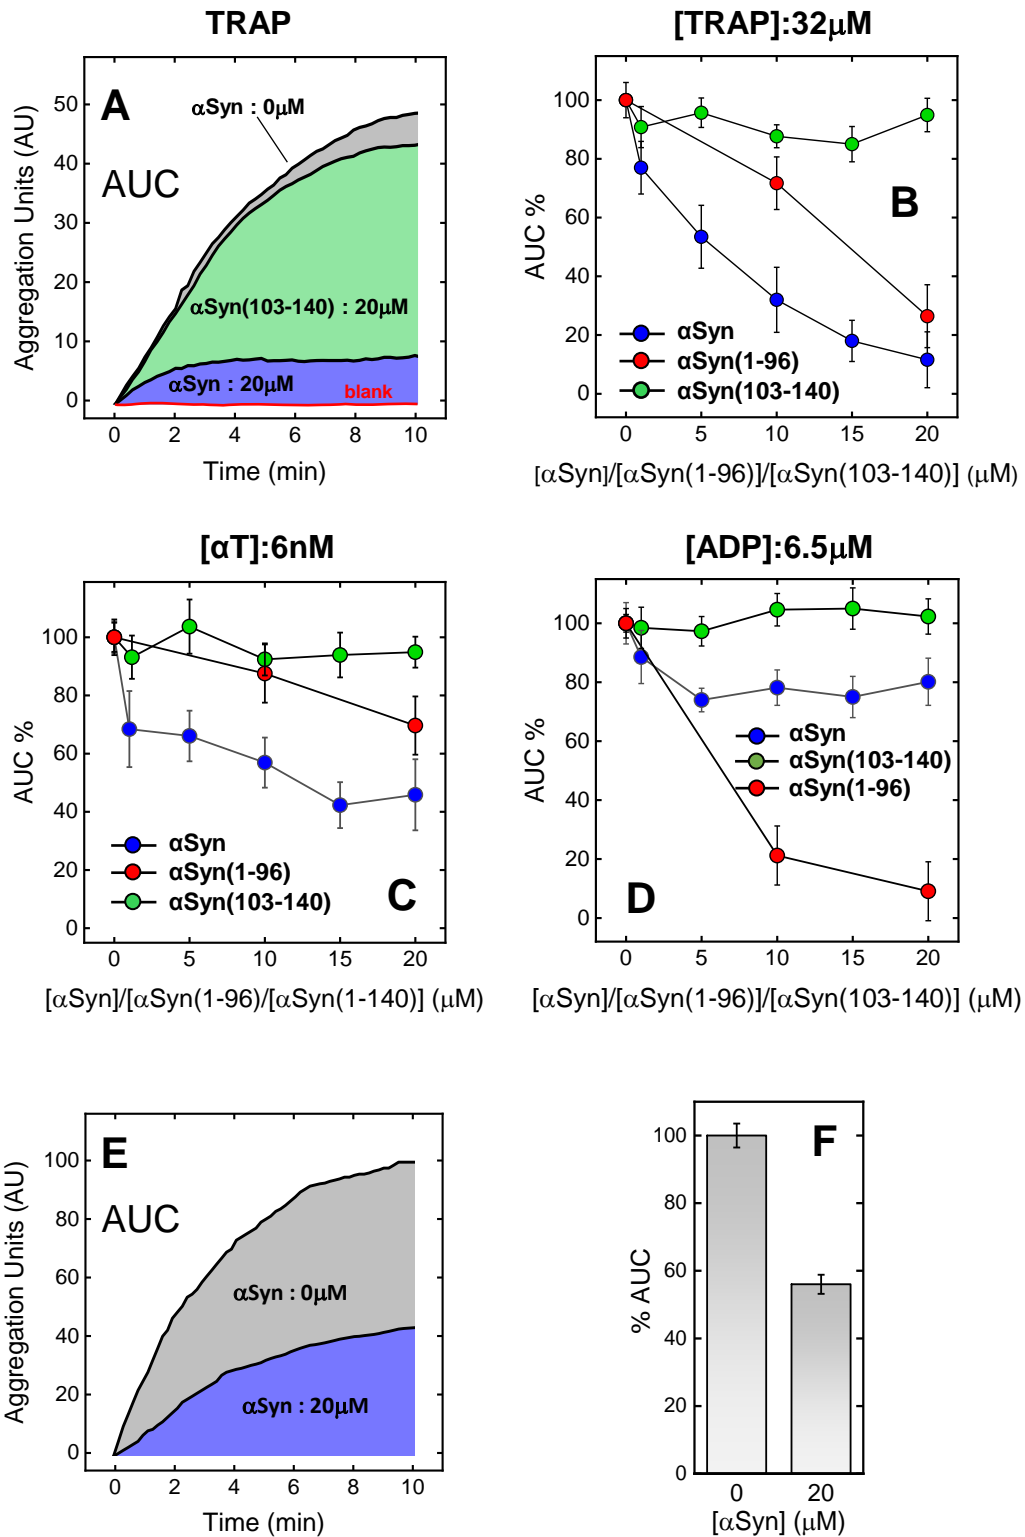

**Figure 2. Effect of  $\alpha$ Syn,  $\alpha$ Syn(1-96) and  $\alpha$ Syn(103-140) on the aggregation of platelets induced by TRAP,  $\alpha$ T or ADP.** (A) Representative impedance aggregometry curves of platelets aggregation induced by TRAP on whole blood in the absence (grey area) and presence of 20  $\mu$ M  $\alpha$ Syn (blue area) or  $\alpha$ Syn(103-140) (green area). (B-D) Impedance aggregometry analysis of platelet agglutination induced by 32  $\mu$ M TRAP6 (B), 6 nM  $\alpha$ T (C), and 6.5  $\mu$ M ADP (D) on whole blood at 37°C at increasing concentrations of full-length  $\alpha$ Syn (●)  $\alpha$ Syn(1-96) (●) or  $\alpha$ Syn(103-140) (●). At each  $\alpha$ Syn concentration, the Area Under the Curve (%AUC) was calculated relative to the value determined in the absence of  $\alpha$ Syn ( $AUC_0$ ). Whole blood samples from healthy donors (160.000 platelets/ $\mu$ l) were incubated with solutions of  $\alpha$ Syn species in HBS. Platelets agglutination was started by adding 20  $\mu$ l of TRAP6 or ADP stock solutions. When the effect of  $\alpha$ Syn on  $\alpha$ T-induce aggregation was measured, protease solutions were pre-incubated with increasing concentrations of  $\alpha$ Syn species and then added to blood samples. (E, F)  $\alpha$ T-induced aggregation of isolated platelets in the presence of  $\alpha$ Syn. (E) Representative impedance aggregometry curves obtained after addition of  $\alpha$ T (6 nM) to washed human platelets ( $200 \cdot 10^3/\mu$ l) at 37°C in the absence (grey) and presence of 20  $\mu$ M  $\alpha$ Syn (blue). (F) Histogram plot of the platelets anti-aggregating effect of  $\alpha$ Syn, as obtained for the data in panel E. For all measurements, each AUC value is the average of single determinations on blood samples from three healthy donors. The error bars correspond to the standard deviation. For further details, see Methods.



*$\alpha$ -Synuclein inhibits thrombin-induced platelets aggregation*

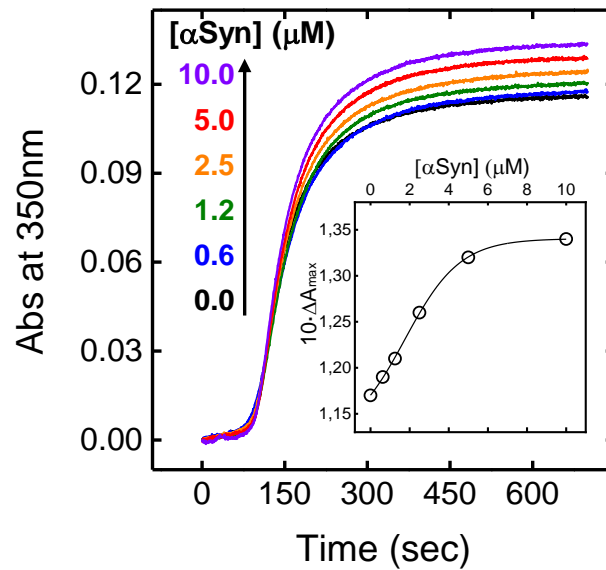

**Figure 3. Effect of  $\alpha$ Syn on  $\alpha$ T-mediated fibrin generation.** Turbidimetric analysis of fibrin generation induced by  $\alpha$ T on purified fibrinogen at increasing  $\alpha$ Syn concentrations, as indicated. To a desalted fibrinogen solution (440 nM, 800  $\mu$ l) in HBS at 37°C, containing 0.1% PEG-8000, was added  $\alpha$ T (1 nM, final concentration) pre-incubated with increasing  $[\alpha$ Syn] and the time-course generation of fibrin was monitored by recording the absorbance increase of the solution at 350 nm. From each clotting curve, the values of  $t_c$ , and  $\Delta A_{\max}$  were extracted. (**Inset**) Plot of  $\Delta A_{\max}$  vs.  $\alpha$ Syn concentration.

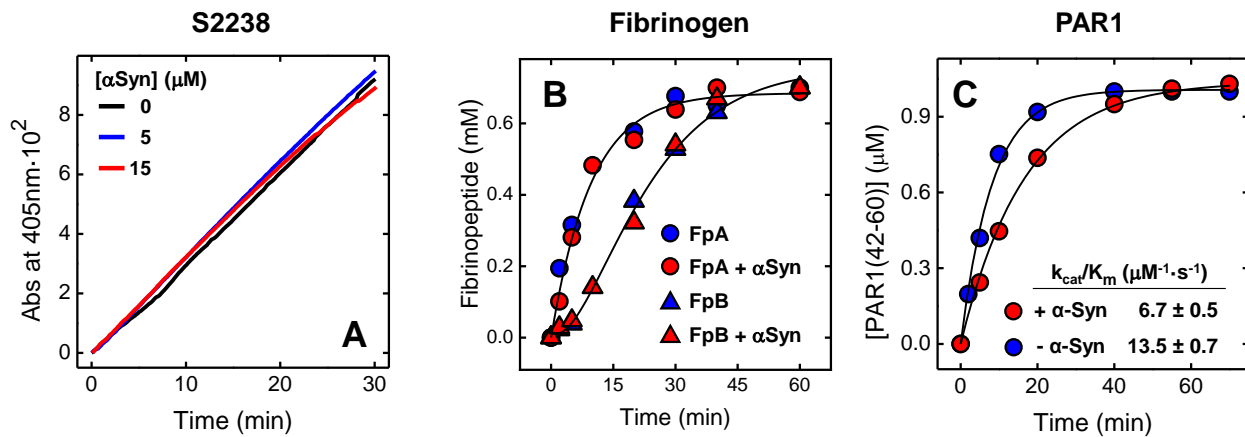

**Figure 4. Effect of  $\alpha$ Syn on  $\alpha$ T-mediated hydrolysis of S2238, Fb and PAR1(38-60).** (A)  $\alpha$ T-catalyzed hydrolysis of the chromogenic substrate S2238 in the presence of increasing  $\alpha$ Syn concentrations. The hydrolytic activity was determined at 37°C in HBS by measuring the release of *p*-nitroaniline (*p*NA) at 405 nm. (B) Release of FpA and FpB from desalted fibrinogen (0.35  $\mu\text{M}$ ) by  $\alpha$ T (300 pM), in the absence or presence of  $\alpha$ Syn (15  $\mu\text{M}$ ). Measurements were carried out at 37°C in HBS and quantified by RP-HPLC (see Methods). Interpolation of the data points with eq. 1 and 2, yielded the apparent specificity constants ( $k_{\text{cat}}/K_m$ ) of FpA and FpB release in the absence ( $k_{\text{cat,A}}/K_{m,A} = 7.2 \pm 0.9 \mu\text{M}^{-1} \cdot \text{s}^{-1}$ ;  $k_{\text{cat,B}}/K_{m,B} = 5.7 \pm 0.6 \mu\text{M}^{-1} \cdot \text{s}^{-1}$ ) and presence ( $k_{\text{cat,A}}/K_{m,A} = 4.7 \pm 2.2 \mu\text{M}^{-1} \cdot \text{s}^{-1}$ ;  $k_{\text{cat,B}}/K_{m,B} = 4.6 \pm 2.1 \mu\text{M}^{-1} \cdot \text{s}^{-1}$ ) of 15  $\mu\text{M}$   $\alpha$ Syn. (C) Cleavage of PAR1(38-60) by  $\alpha$ T in the absence (●) and presence (○) of  $\alpha$ Syn (15  $\mu\text{M}$ ). The cleavage of PAR1(38-60) peptide (1  $\mu\text{M}$ ) by  $\alpha$ T (150 pM) was carried out at 25°C in TBS and the time course of PAR1(42-60) fragment release quantified by RP-HPLC. The data points were fitted with eq. 3, to yield the values of  $k_{\text{cat}}/K_m$  in the absence and presence of  $\alpha$ Syn.

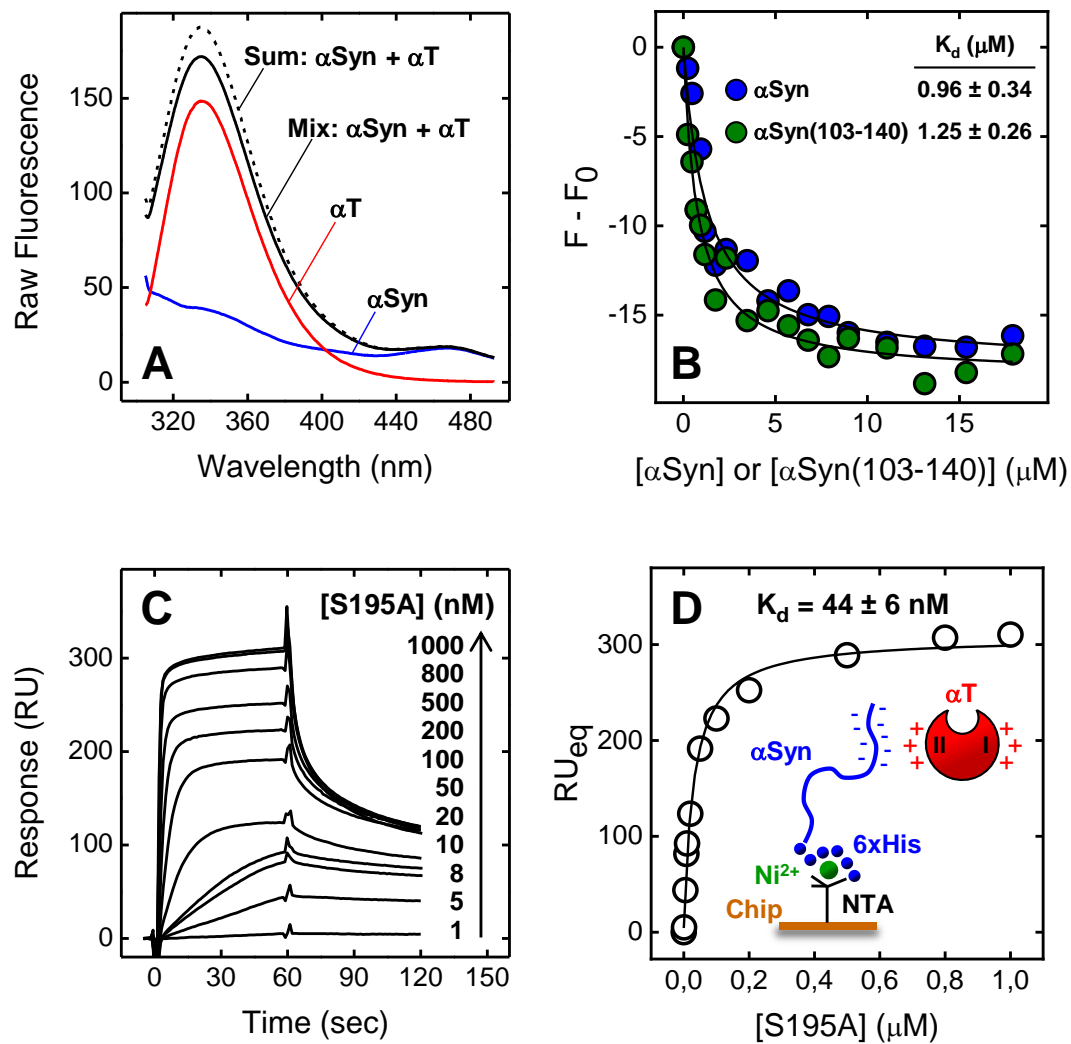

**Figure 5. Probing  $\alpha$ T- $\alpha$ Syn interaction by fluorescence spectroscopy and surface plasmon resonance.** (A) Fluorescence spectra of isolated  $\alpha$ Syn (20  $\mu$ M, —) and  $\alpha$ T (70 nM, —), and of the experimental complex containing the interacting proteins at the corresponding concentrations (—). For comparison, the theoretical sum spectrum (---) is also reported. Emission spectra were recorded in HBS at 37°C, after excitation at 295 nm, and subtracted for the corresponding baseline. (B) Fluorescence binding measurements of  $\alpha$ Syn interaction with  $\alpha$ T. To a solution of  $\alpha$ T (70 nM) in HBS at 37°C were added aliquots (2–20  $\mu$ l) of full-length  $\alpha$ Syn (●) and  $\alpha$ Syn(103–140) (●). The samples were excited at 295 nm, and the emission intensity was recorded at 334 nm. Each spectrum was subtracted for the contribution of  $\alpha$ Syn alone at the corresponding concentration and expressed as  $F - F_0$ , where  $F$  and  $F_0$  are the fluorescence intensity in the presence or absence of  $\alpha$ Syn derivatives. The data points were interpolated with eq. 4, yielding the  $K_d$  value as indicated. (C, D) SPR analysis of  $\alpha$ T binding to immobilized  $\alpha$ Syn. Recombinant wild-type 6xHis- $\alpha$ Syn was immobilized onto a Ni<sup>2+</sup>-NTA sensor chip and increasing concentrations of S195A thrombin mutant were injected in the mobile phase. (C) Sensograms relative to S195A binding. (D) Plot of  $RU_{max}$  vs. S195A concentration (○). Fitting of data points with eq. 6 yielded the  $K_d$  value for the synuclein-thrombin complex, as indicated. All SPR measurements were carried out at 37°C in HBS-EP<sup>+</sup>.



*$\alpha$ -Synuclein inhibits thrombin-induced platelets aggregation*

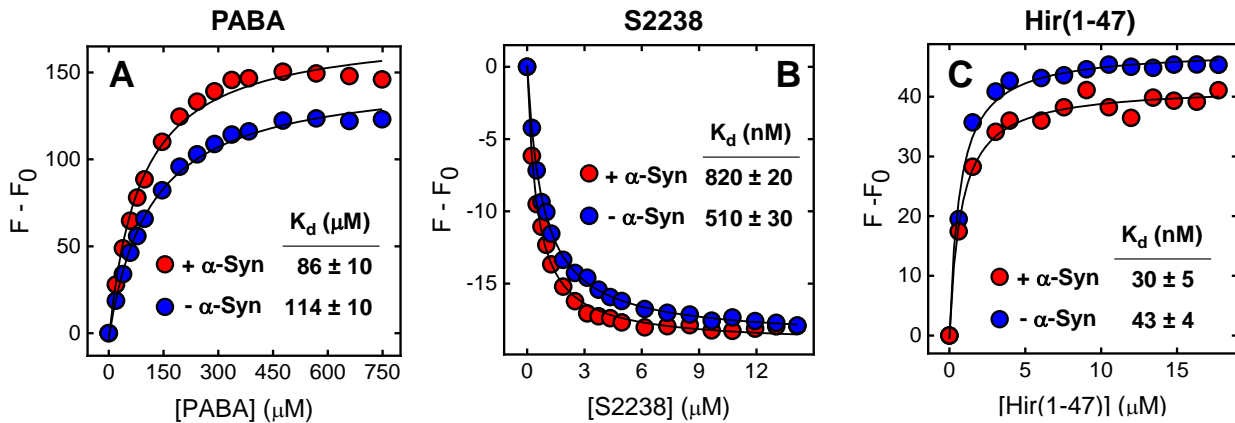

**Figure 6. Probing the role of thrombin active site in  $\alpha$ Syn- $\alpha$ T interaction.** Effect of  $\alpha$ Syn on the affinity of the active-site ligands PABA (A), S2238 (B), or Hir(1-47) (C) for thrombin. Fluorescence binding measurements were carried out in HBS at 37°C by adding increasing ligand concentrations to thrombin solutions, in the absence or presence of 20  $\mu\text{M}$   $\alpha$ Syn. For the binding of PABA, samples (40 nM) were excited at 336nm, the fluorescence intensity of the ligand was recorded at 375 nm and corrected for inner filter effect. With S2238 and Hir(1-47), protein samples (50 nM and 70 nM, respectively) were excited at 295 nm, while thrombin fluorescence was recorded at 334 nm. When the binding of S2238 to thrombin was being studied, the inactive S195A mutant was used. The data points relative to the binding of PABA and S2238 were interpolated with eq. 4, describing a single-site interaction model, while the data for the binding of Hir(1-47) were fitted with eq. 5, describing a tight-binding model. After interpolation, the  $K_d$  values were obtained as fitting parameters, as indicated.

*α-Synuclein inhibits thrombin-induced platelets aggregation*

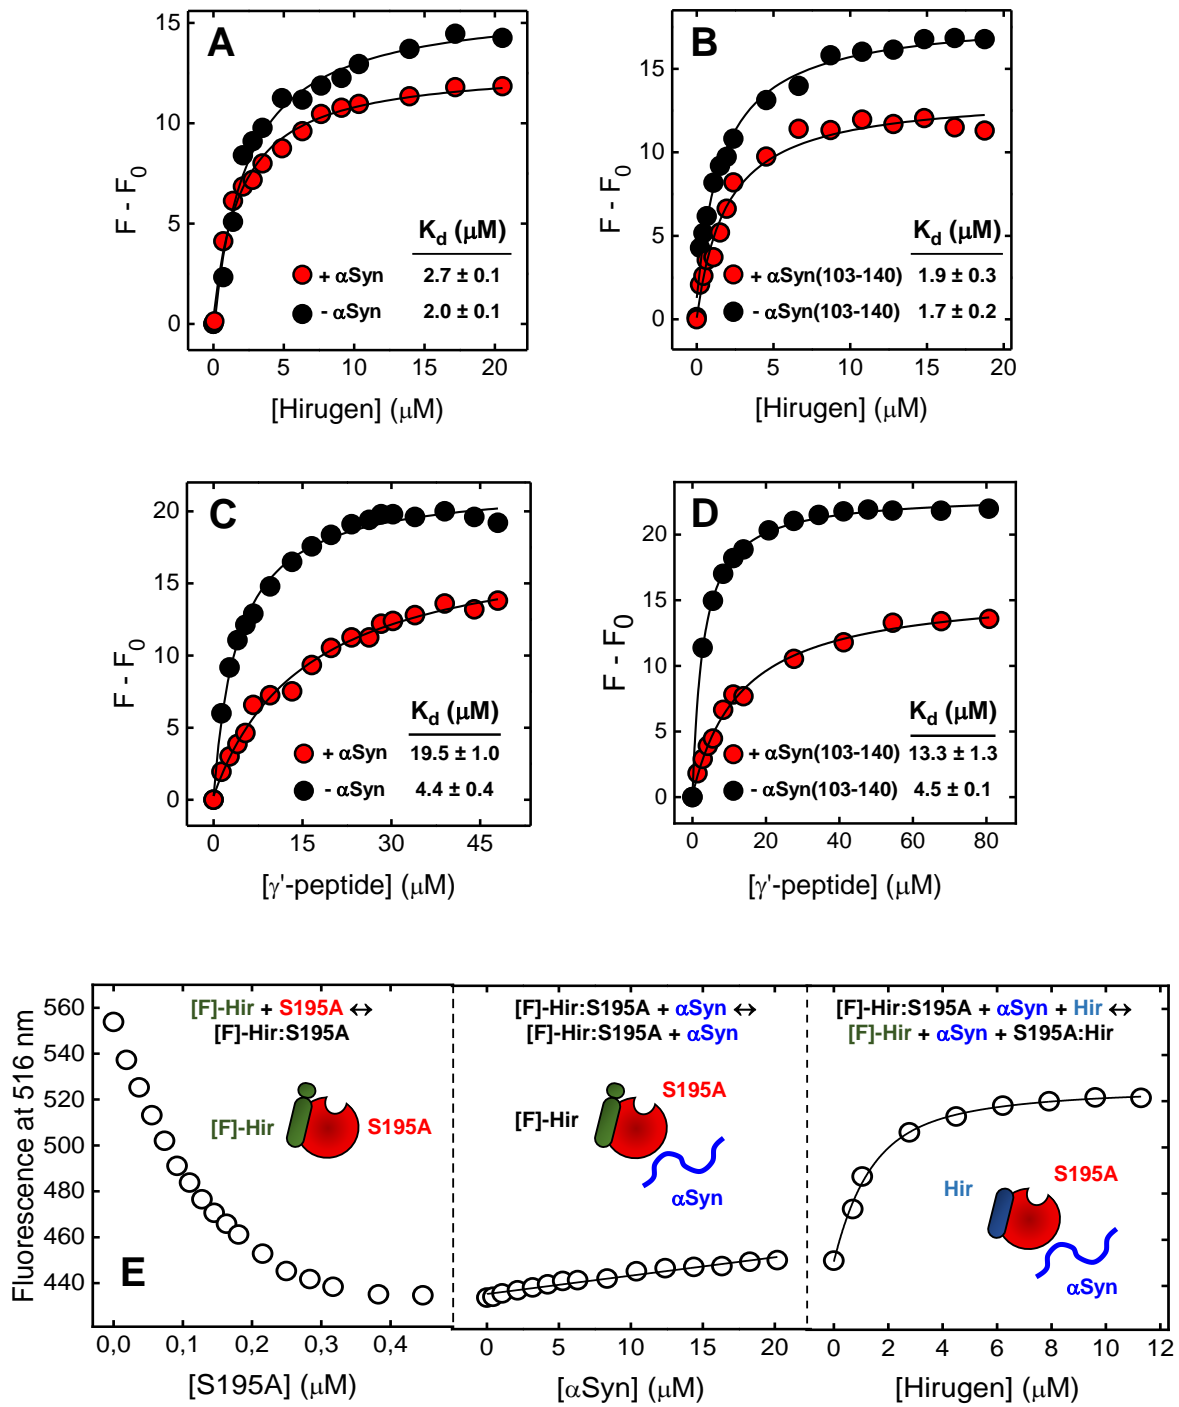

*$\alpha$ -Synuclein inhibits thrombin-induced platelets aggregation*

**Figure 7. Probing the role of thrombin exosites in  $\alpha$ Syn- $\alpha$ T interaction.** (A, B) The role of exosite 1. Effect of  $\alpha$ Syn and  $\alpha$ Syn(103-140) on the affinity of hirugen for thrombin exosite-1. Fluorescence measurements of hirugen binding to  $\alpha$ T (70 nM) in the absence or presence of saturating concentrations (20  $\mu$ M) of full-length  $\alpha$ Syn (A) or  $\alpha$ Syn(103-140) (B). (C, D) The role of exosite 2. Effect of  $\alpha$ Syn and  $\alpha$ Syn(103-140) on the affinity of  $\gamma'$ -peptide for thrombin exosite-2. Fluorescence measurements of  $\gamma'$ -peptide binding to  $\alpha$ T (70 nM) in the absence or presence of saturating concentrations (20  $\mu$ M) of full-length  $\alpha$ Syn (C) or  $\alpha$ Syn(103-140) (D). Protein samples in HBS at 37°C were excited at 295 nm and the fluorescence intensity was recorded at 334 nm, after baseline subtraction. The data points were interpolated with eq. 4 to obtain the  $K_d$  values, as indicated. (E) Displacement of [F]-hirugen from  $\alpha$ T exosite -1 by  $\alpha$ Syn. *Left panel*, Binding of S195A to [F]-hirugen (60 nM). The data points were interpolated with eq. 5, yielding a  $K_d$  of  $30 \pm 8$ nM. *Middle panel*, Displacement of [F]-hirugen from the complex with S195A by incremental concentrations of  $\alpha$ Syn. A moderate increase of fluorescence (~17%) was observed, suggestive of only a partial displacement of [F]-hirugen by  $\alpha$ Syn. *Right panel*, Displacement of [F]-hirugen from S195A by incremental concentrations of unlabelled hirugen. A marked increase of fluorescence (~65%) was measured as the result of complete displacement of residual [F]-hirugen from  $\alpha$ T exosite-1. Samples in HBS, containing 0.1% PEG-8000, were excited at 25°C at 492 nm and the fluorescence of [F]-hirugen, bound to or released from S195A, was recorded at 516 nm.



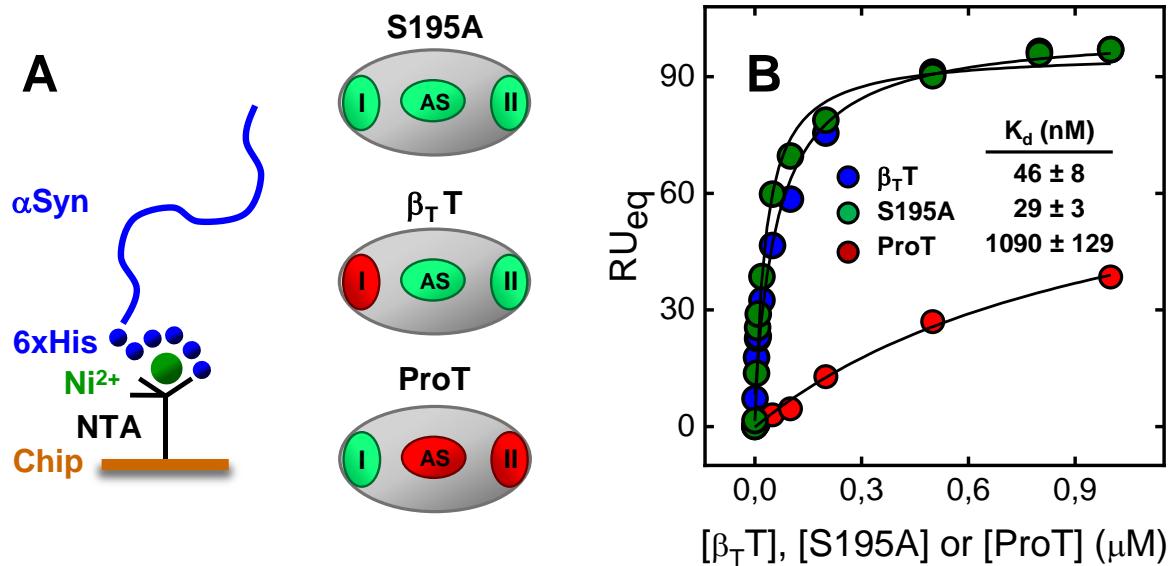

**Figure 8. Effect of selective perturbation of thrombin exosites on the affinity for  $\alpha$ Syn.** (A) Schematic representation of the protease-domain of rS195A thrombin mutant,  $\beta_T$ -thrombin ( $\beta_T$ T), and prothrombin (ProT). The active site (AS) and exosite-1 (I) and exosite-2 (II) are colored according to the conformational/functional state they assume in the different thrombin derivatives, compared to  $\alpha$ T (see text); *green*: unperturbed or only slightly perturbed; *red*: heavily perturbed. (B) SPR analysis of the binding of S195A,  $\beta_T$ T, and ProT to 6xHis- $\alpha$ Syn immobilized on a Ni<sup>2+</sup>-NTA sensor chip. The values of RU<sub>max</sub> were plotted *versus* the concentration of thrombin derivatives and the data points were interpolated with eq. 6, yielding the corresponding  $K_d$  values as indicated. Measurements were carried out at 37°C in HBS-EP<sup>+</sup>, pH 7.4.

*$\alpha$ -Synuclein inhibits thrombin-induced platelets aggregation*

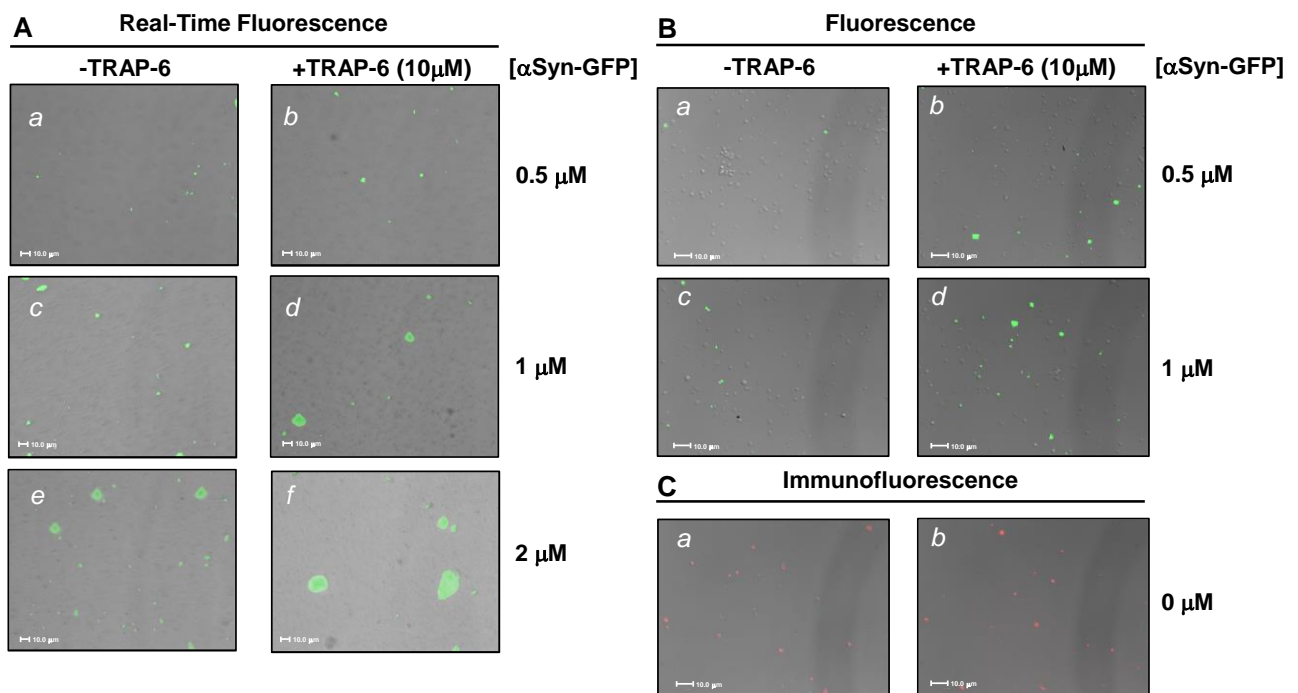

**Figure 9. Fluorescence microscopy analysis of  $\alpha$ Syn membrane localization in resting and activated platelets.** (A) Time-lapse fluorescence microscopy. Isolated platelets were seeded ( $20 \times 10^6$  platelets/well) in 24-well culture plates. After 24 h, increasing concentrations of  $\alpha$ Syn-GFP (0, 0.5, 1.0, and 2.0  $\mu$ M) in HBS were added to resting and TRAP6 (10 $\mu$ M) activated platelets, as indicated in panels a-f. After 30-min incubation at 37°C, under 5% CO<sub>2</sub> flow, images were taken in real time. (B) Fluorescence microscopy. Seeded platelets, either resting or activated, ( $16 \times 10^6$  platelets/well) were incubated for 24 h with  $\alpha$ Syn-GFP (0.7 and 1.4  $\mu$ M), washed twice with PBS and fixed for 20 min in 2% paraformaldehyde. (C) Immunofluorescence microscopy. Restring and activated platelets (not treated with  $\alpha$ Syn-GFP) were seeded ( $16 \times 10^6$  platelets/well), fixed with paraformaldehyde and incubated for 1 h at 37°C with mouse anti-human  $\alpha$ Syn monoclonal antibody, namely  $\alpha$ -synuclein(211), (5  $\mu$ g/ml) followed by addition of a diluted (1:200) Alexa Fluor 594-conjugated goat anti-mouse IgG (red fluorescence). Both primary and secondary antibodies were diluted in PBS, containing 0.5% bovine serum albumin. Unspecific binding was assessed by incubating platelets with the secondary antibody alone, in the absence of the primary antibody. Final pictures resulted from merging differential interference contrast (DIC) and fluorescence images.

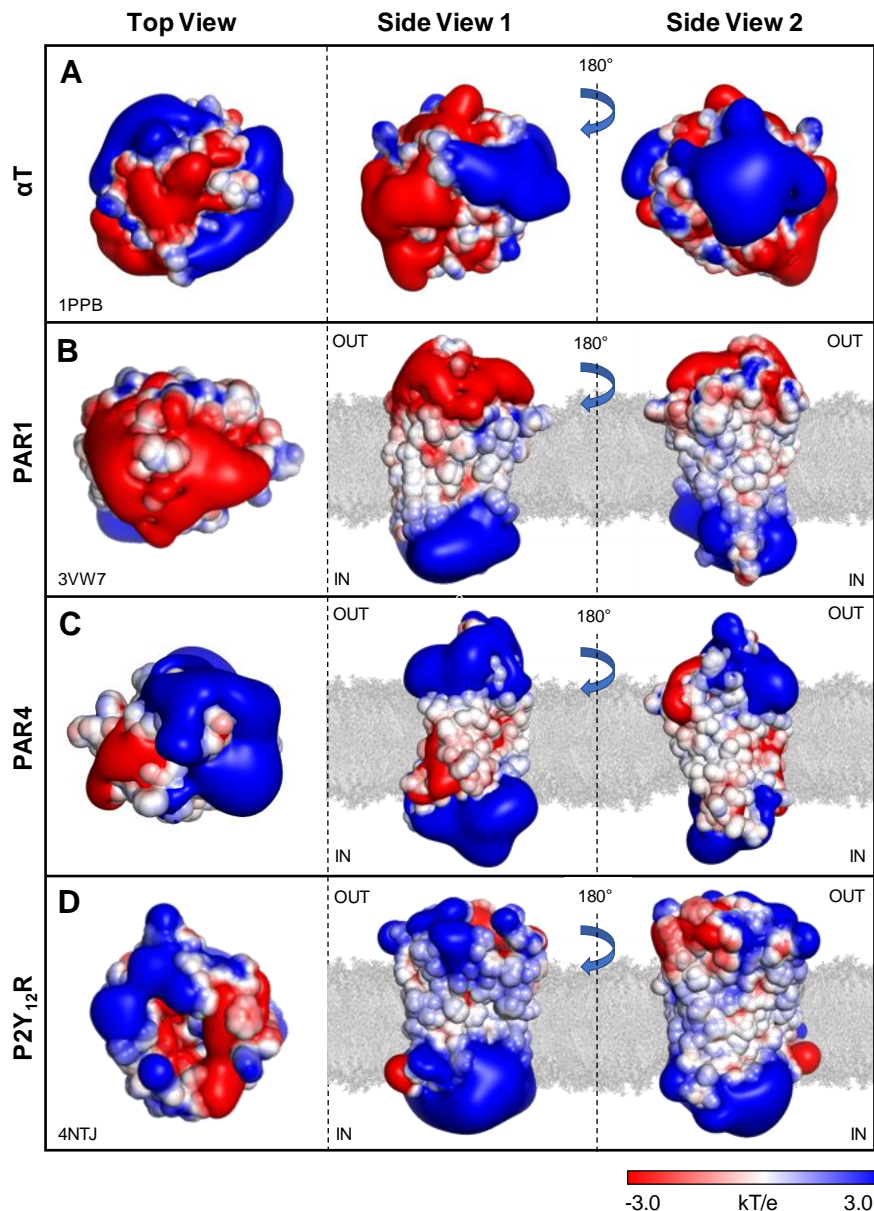

**Figure 10. Surface electrostatic potential of  $\alpha$ T (A),  $\alpha$ T receptor PAR1 (B), and ADP receptor P2Y<sub>12</sub>R (C).** Calculations were carried out using the APBS software on the deposited structures of  $\alpha$ T (1ppb), PAR1 (3vw7), P2Y<sub>12</sub>R (4ntj). PAR4 was modeled by homology on the PAR1 structure. Images were generated with PyMOL vs. 1.3 (DeLano Scientific, San Diego, CA, USA). The surface is coloured according to the electrostatic potential (blue, positive; red, negative) and expressed as kJ/(mol·q). Phospholipid double layer (grey) has been manually inserted. (A)  $\alpha$ T displays an asymmetrical electrostatic potential, with a strongly negative active site (AS) region flanked by the two electropositive exosites (I and II). (B) The structure of PAR1, lacking the flexible exodomain A<sup>22</sup>-E<sup>90</sup>, displays a highly polarized charged distribution, with a strongly negative extracellular surface (OUT) and a positive intracellular region (IN). As expected, the transmembrane region in contact with the phospholipid apolar chains is essentially neutral. PAR1 contains a Na<sup>+</sup>-ion bound in the middle of the 7TM-helix bundle. The contribution of this ion was not taken into account during electrostatic calculations. (C, D) PAR4 and P2Y<sub>12</sub>R display a charge distribution similar to that of PAR1. However, contrary to PAR1, the extracellular region of P2Y<sub>12</sub>R and PAR4 is mainly electropositive with only some interspersed negative pots.

*α-Synuclein inhibits thrombin-induced platelets aggregation*

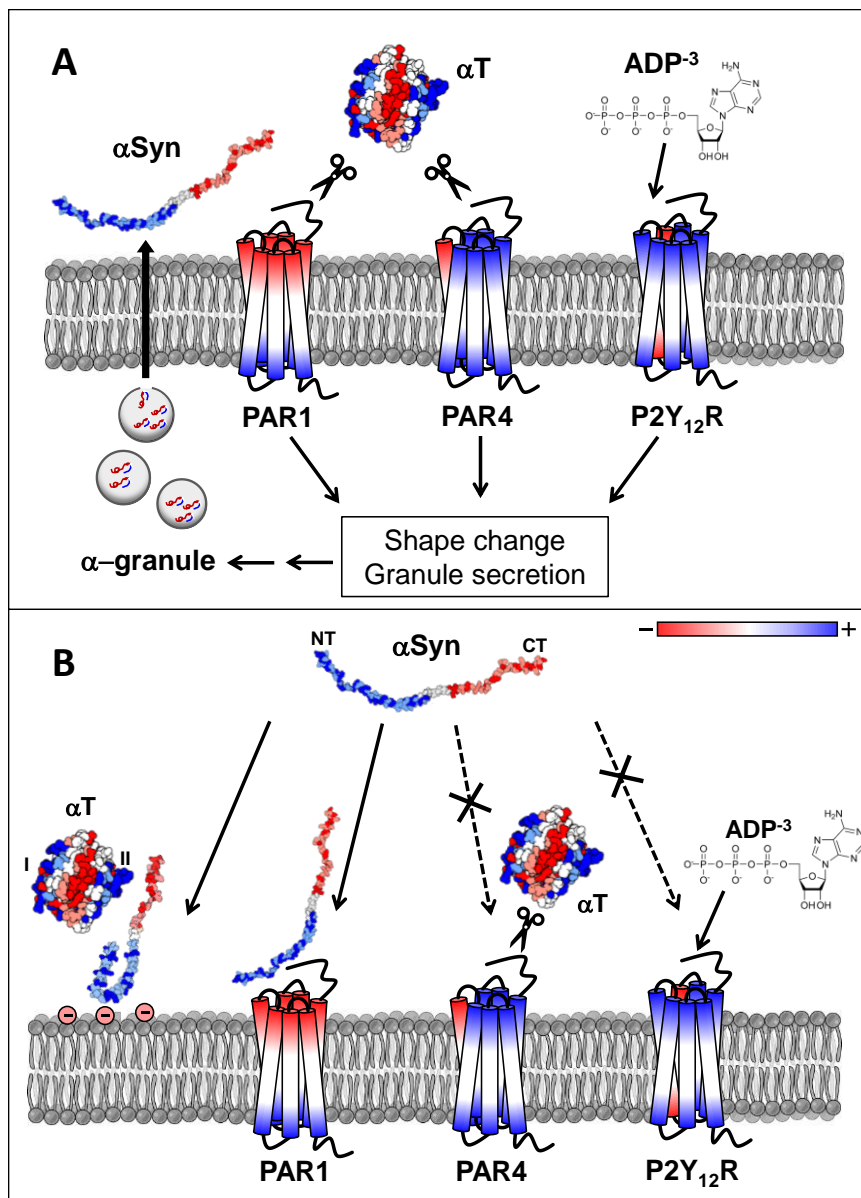

**Figure 11. Schematic representation of the proposed mechanism of  $\alpha$ Syn platelet antiaggregating activity.** (A) Proteolysis of PAR1 and PAR4 exodomains by  $\alpha$ T or direct binding of ADP to P2Y<sub>12</sub>R trigger intracellular signalling cascade, leading (among other effects) to platelet shape change, reversal of plasma membrane polarization, and secretion of  $\alpha$ -granules containing  $\alpha$ Syn. (B) Secreted  $\alpha$ Syn or circulating plasma  $\alpha$ Syn can interact through its positive NT with the highly negative PAR1 extracellular domain and impair  $\alpha$ T binding/activation. Due to electrostatic repulsion,  $\alpha$ Syn is not expected to interact with the positive exodomain surface of PAR4 and P2Y<sub>12</sub>R, allowing  $\alpha$ T and ADP to still bind and activate the receptors. Extracellular  $\alpha$ Syn is thought to adhere to the negative outer leaflet of activated platelets plasma membrane through its positive NT, which becomes ordered and concentrated on the membrane surface, while the negative C-terminal tail remains disordered/flexible to favorably couple with the electropositive  $\alpha$ T exosite 2. As a result, part of  $\alpha$ T molecules are scavenged and platelet activation is down-regulated by one of the activation products (i.e.  $\alpha$ Syn) in a negative feedback mechanism. Blue and red colors indicate electropositive and electronegative regions, respectively, on  $\alpha$ Syn,  $\alpha$ T, and platelet receptors; phospholipids are in grey.
